# Supplementary material for: Cooperative Targeting of Immunotherapy-Resistant Melanoma and Lung Cancer by an AXL-Targeting Antibody–Drug Conjugate and Immune Checkpoint Blockade
Source: Oxford University Press journal article supplement (doi:10.1158/0008-5472.can-20-0434), 2021-02-02
Supplement: 00085472can200434-sup-237005_3_supp_6856315_qn675g.xls [file 00085472can200434-sup-237005_3_supp_6856315_qn675g.xls]

NAME	DESCRIPTION	GENE_SYMBOL	GENE_TITLE	SCORE
HLA-L	null	null	null	-8.011813
CRLF2	null	null	null	-6.532445
MKRN4P	null	null	null	-6.1538315
NCKAP5	null	null	null	-6.1538315
GZMA	null	null	null	-5.731473
RAP1BP1	null	null	null	-5.688531
KLHDC7B	null	null	null	-5.6198807
UNC13A	null	null	null	-5.5684834
CYTIP	null	null	null	-5.4635806
LINC00898	null	null	null	-5.330357
MEMO1P3	null	null	null	-5.284217
CSTA	null	null	null	-5.230935
PSG2	null	null	null	-5.166368
MAFA	null	null	null	-5.1017447
ANXA8	null	null	null	-5.0643244
RAB11AP1	null	null	null	-5.0643244
PPP1R3G	null	null	null	-5.0642376
FDCSP	null	null	null	-5.015515
TENM2	null	null	null	-4.9256487
CD300C	null	null	null	-4.924255
RORC	null	null	null	-4.9006543
MYCT1	null	null	null	-4.8945007
CASP14	null	null	null	-4.892684
LINC02167	null	null	null	-4.8634844
TRIM29	null	null	null	-4.8518014
STATH	null	null	null	-4.8514733
DPP6	null	null	null	-4.8344464
IL1A	null	null	null	-4.791717
JAK3	null	null	null	-4.7448344
TRBC1	null	null	null	-4.740721
ZNF683	null	null	null	-4.740721
TUBAL3	null	null	null	-4.685521
PAPPA2	null	null	null	-4.6852846
OLAH	null	null	null	-4.684787
RPLP0P2	null	null	null	-4.6772866
AQP7	null	null	null	-4.6688166
MRGPRX3	null	null	null	-4.6590066
C5orf46	null	null	null	-4.6436577
LINC01091	null	null	null	-4.6436577
CRYM	null	null	null	-4.641581
GRK7	null	null	null	-4.641581
CYP1A1	null	null	null	-4.6368966
LINC02725	null	null	null	-4.620614
CSF2RA	null	null	null	-4.611555
SAA2	null	null	null	-4.583425
CD300A	null	null	null	-4.57565
NELL2	null	null	null	-4.57565
GTF2IP7	null	null	null	-4.5680737
RYR1	null	null	null	-4.5680737
GNLY	null	null	null	-4.5217996
C3	null	null	null	-4.5104885
NMU	null	null	null	-4.488745
IL36B	null	null	null	-4.460538
LINC01133	null	null	null	-4.4551945
FAT2	null	null	null	-4.4450817
KRT14	null	null	null	-4.4450817
ATP6V0D2	null	null	null	-4.4177485
GIMAP4	null	null	null	-4.4177485
LINC02273	null	null	null	-4.4177485
SV2A	null	null	null	-4.4177485
LINC01088	null	null	null	-4.3688684
CCR5	null	null	null	-4.357336
PLEKHB1	null	null	null	-4.302729
RCSD1	null	null	null	-4.302729
EN1	null	null	null	-4.274738
LINC01370	null	null	null	-4.274738
SMPD3	null	null	null	-4.274738
IL34	null	null	null	-4.261095
TEK	null	null	null	-4.2524786
KCNN3	null	null	null	-4.242177
CCL3	null	null	null	-4.235221
CCR2	null	null	null	-4.1919146
NECAB1	null	null	null	-4.1919146
SLC2A9	null	null	null	-4.1919146
TBC1D10C	null	null	null	-4.1919146
GPRC5B	null	null	null	-4.188718
CGB7	null	null	null	-4.162633
CPXM2	null	null	null	-4.162633
LRRC3-DT	null	null	null	-4.162633
TSPAN2	null	null	null	-4.162633
IL2RG	null	null	null	-4.1614227
CD2	null	null	null	-4.1491466
IL36RN	null	null	null	-4.1234913
TMEM40	null	null	null	-4.12338
ADAMTS18	null	null	null	-4.0852118
HLA-K	null	null	null	-4.0852118
CFAP99	null	null	null	-4.067697
BIK	null	null	null	-4.0664706
CDH16	null	null	null	-4.0664706
CTAGE16P	null	null	null	-4.0664706
HEPHL1	null	null	null	-4.0664706
TMC5	null	null	null	-4.0664706
UBASH3A	null	null	null	-4.0664706
CDH3	null	null	null	-4.064766
RPL17P22	null	null	null	-4.0590425
CACNA1H	null	null	null	-4.05508
RPL39P40	null	null	null	-4.05508
SLCO2B1	null	null	null	-4.0189505
ATL1	null	null	null	-4.017477
TUBA4A	null	null	null	-4.015909
ANO9	null	null	null	-3.987344
PPP1R16B	null	null	null	-3.987344
TMPRSS11F	null	null	null	-3.987344
RPL7P26	null	null	null	-3.9530332
SEL1L3	null	null	null	-3.9530332
RHCE	null	null	null	-3.9527793
TREM1	null	null	null	-3.926128
ANKRD45	null	null	null	-3.923691
AOAH	null	null	null	-3.923691
CFAP74	null	null	null	-3.923691
DOC2A	null	null	null	-3.923691
EGFEM1P	null	null	null	-3.923691
KPNA7	null	null	null	-3.923691
LINC02586	null	null	null	-3.923691
MASP1	null	null	null	-3.923691
MATK	null	null	null	-3.923691
PLVAP	null	null	null	-3.923691
PROM1	null	null	null	-3.923691
LINC00520	null	null	null	-3.9057431
SPANXN4	null	null	null	-3.899793
NCF2	null	null	null	-3.8983405
ACTA1	null	null	null	-3.886534
LINC01411	null	null	null	-3.8836539
GFY	null	null	null	-3.876186
ERP27	null	null	null	-3.8555987
HNRNPA1P35	null	null	null	-3.8555987
ROS1	null	null	null	-3.8555987
SNORD48	null	null	null	-3.8555987
THRB	null	null	null	-3.8555987
PTPRN	null	null	null	-3.854931
LINC02154	null	null	null	-3.8545547
CD48	null	null	null	-3.8261442
ESYT3	null	null	null	-3.8261442
KRT3	null	null	null	-3.8261442
MIR331	null	null	null	-3.8261442
NLRC4	null	null	null	-3.8261442
SLC6A12	null	null	null	-3.8261442
TYRP1	null	null	null	-3.8261442
ZNF793	null	null	null	-3.8261442
SERPING1	null	null	null	-3.8078012
ANXA8L1	null	null	null	-3.8046336
C3orf80	null	null	null	-3.8046336
CA10	null	null	null	-3.8046336
FAAH2	null	null	null	-3.8046336
FUT1	null	null	null	-3.8046336
VAV1	null	null	null	-3.8046336
DRGX	null	null	null	-3.7991438
LYPD5	null	null	null	-3.7987657
RSAD2	null	null	null	-3.791665
KRT17	null	null	null	-3.782803
PDE1C	null	null	null	-3.745596
NECAB2	null	null	null	-3.7379515
VDAC1P7	null	null	null	-3.7346714
NCKAP1L	null	null	null	-3.7305267
CCN5	null	null	null	-3.72908
IFI30	null	null	null	-3.684722
KIRREL3-AS3	null	null	null	-3.684722
THEG	null	null	null	-3.684722
UNC45B	null	null	null	-3.684722
RTL1	null	null	null	-3.6661434
MSC-AS1	null	null	null	-3.6528137
PLEKHA6	null	null	null	-3.6260219
ADGRV1	null	null	null	-3.6246376
AKAP14	null	null	null	-3.6246376
CATSPERD	null	null	null	-3.6246376
CRYBA2	null	null	null	-3.6246376
EEF1GP1	null	null	null	-3.6246376
GPRIN3	null	null	null	-3.6246376
IFNA5	null	null	null	-3.6246376
KCNAB1-AS2	null	null	null	-3.6246376
LCN2	null	null	null	-3.6246376
LEFTY1	null	null	null	-3.6246376
LINC00964	null	null	null	-3.6246376
LINC02105	null	null	null	-3.6246376
LINC02731	null	null	null	-3.6246376
LIPE	null	null	null	-3.6246376
MIR3167	null	null	null	-3.6246376
MIR548H3	null	null	null	-3.6246376
NKG7	null	null	null	-3.6246376
PLIN1	null	null	null	-3.6246376
RNA5SP268	null	null	null	-3.6246376
RPS8P4	null	null	null	-3.6246376
SLC51B	null	null	null	-3.6246376
SMIM1	null	null	null	-3.6246376
SRL	null	null	null	-3.6246376
STARD13-AS	null	null	null	-3.6246376
SUMO2P17	null	null	null	-3.6246376
TAFA1	null	null	null	-3.6246376
TMEM30CP	null	null	null	-3.6246376
CPA3	null	null	null	-3.6010578
HIPK1-AS1	null	null	null	-3.5999956
FPR1	null	null	null	-3.5873313
IL1B	null	null	null	-3.5757198
PLA2G2D	null	null	null	-3.575337
HIST2H2AC	null	null	null	-3.574582
SIRPG	null	null	null	-3.574582
TNNI3	null	null	null	-3.5736105
IL2RB	null	null	null	-3.5655553
XIRP1	null	null	null	-3.549151
POU2F3	null	null	null	-3.537367
ANXA9	null	null	null	-3.5334136
HCAR2	null	null	null	-3.5334136
SAA1	null	null	null	-3.5326037
GAPDHP72	null	null	null	-3.5295408
ODF3L2	null	null	null	-3.5294323
CD14	null	null	null	-3.5253098
CIB4	null	null	null	-3.5253098
EEF1B2P7	null	null	null	-3.5253098
NPM1P24	null	null	null	-3.5253098
RSPO2	null	null	null	-3.5253098
ITGB2	null	null	null	-3.517786
GAPDHP21	null	null	null	-3.5100458
CD180	null	null	null	-3.503751
FAM83F	null	null	null	-3.502286
RPL21P41	null	null	null	-3.492361
CLDN1	null	null	null	-3.4806852
BPI	null	null	null	-3.4804268
CARD11	null	null	null	-3.4804268
CCL26	null	null	null	-3.4804268
CD247	null	null	null	-3.4804268
CNTN3	null	null	null	-3.4804268
GPR78	null	null	null	-3.4804268
HLA-DRB5	null	null	null	-3.4804268
KANK3	null	null	null	-3.4804268
LINC00887	null	null	null	-3.4804268
LINC01135	null	null	null	-3.4804268
LINC02392	null	null	null	-3.4804268
LINC02763	null	null	null	-3.4804268
PCK1	null	null	null	-3.4804268
PTGDR2	null	null	null	-3.4804268
SLC6A7	null	null	null	-3.4804268
TMEM163	null	null	null	-3.4804268
GAS7	null	null	null	-3.4779499
EWSAT1	null	null	null	-3.47274
NTF4	null	null	null	-3.47274
PLXNA4	null	null	null	-3.472226
SHOC1	null	null	null	-3.472226
HESX1	null	null	null	-3.4711163
KRT16	null	null	null	-3.4711163
POTEF	null	null	null	-3.4668834
SLC7A8	null	null	null	-3.465468
RELN	null	null	null	-3.4591484
AOC3	null	null	null	-3.4577458
CFAP97D1	null	null	null	-3.4576318
SMPDL3B	null	null	null	-3.4576318
SELL	null	null	null	-3.457586
INHBE	null	null	null	-3.4511282
MMP9	null	null	null	-3.4451175
PCBP2P3	null	null	null	-3.443149
PI3	null	null	null	-3.412595
ADGRF4	null	null	null	-3.4061897
SORBS2	null	null	null	-3.4051454
MEG9	null	null	null	-3.393723
GRIP2	null	null	null	-3.3933668
MGAM	null	null	null	-3.3933668
USP12PY	null	null	null	-3.3933668
LINC01828	null	null	null	-3.3900404
WFDC10B	null	null	null	-3.377115
PCDH12	null	null	null	-3.3375895
ARL14EPL	null	null	null	-3.3375123
FAT3	null	null	null	-3.3240812
ZNF474	null	null	null	-3.3220675
NAT16	null	null	null	-3.3013396
GPR1	null	null	null	-3.296758
ATP6V0A4	null	null	null	-3.2861078
FAM83A	null	null	null	-3.2809236
SPHKAP	null	null	null	-3.2796736
LINC01322	null	null	null	-3.2788749
TBXA2R	null	null	null	-3.2788749
XCR1	null	null	null	-3.2771199
MGP	null	null	null	-3.2562585
GAPDHP44	null	null	null	-3.2524998
NXPE2	null	null	null	-3.2328598
C19orf84	null	null	null	-3.2250302
HSH2D	null	null	null	-3.2250302
LINC01912	null	null	null	-3.2250302
C4orf54	null	null	null	-3.2244906
ABCG1	null	null	null	-3.2226138
C12orf42	null	null	null	-3.2226138
C21orf91-OT1	null	null	null	-3.2226138
CD3G	null	null	null	-3.2226138
CD69	null	null	null	-3.2226138
CLEC4M	null	null	null	-3.2226138
COL20A1	null	null	null	-3.2226138
COX7A2P1	null	null	null	-3.2226138
CRTAM	null	null	null	-3.2226138
CXCR4	null	null	null	-3.2226138
CXCR6	null	null	null	-3.2226138
FAM209A	null	null	null	-3.2226138
FARP1-AS1	null	null	null	-3.2226138
FER1L6	null	null	null	-3.2226138
FGL2	null	null	null	-3.2226138
GBA3	null	null	null	-3.2226138
GPR132	null	null	null	-3.2226138
IGFBP1	null	null	null	-3.2226138
IGFBP7-AS1	null	null	null	-3.2226138
LCN1	null	null	null	-3.2226138
LHX6	null	null	null	-3.2226138
LINC00299	null	null	null	-3.2226138
LINC00482	null	null	null	-3.2226138
LINC01251	null	null	null	-3.2226138
LINC02393	null	null	null	-3.2226138
LINC02434	null	null	null	-3.2226138
MAF	null	null	null	-3.2226138
MIA	null	null	null	-3.2226138
NLRC3	null	null	null	-3.2226138
NSG1	null	null	null	-3.2226138
OR7E99P	null	null	null	-3.2226138
PLIN4	null	null	null	-3.2226138
RNA5SP246	null	null	null	-3.2226138
RNU6-137P	null	null	null	-3.2226138
RPL34P20	null	null	null	-3.2226138
SNORD121A	null	null	null	-3.2226138
SPP1	null	null	null	-3.2226138
STOML3	null	null	null	-3.2226138
TLR10	null	null	null	-3.2226138
TNFRSF10D	null	null	null	-3.2226138
TNFSF12-TNFSF13	null	null	null	-3.2226138
TRAF3IP3	null	null	null	-3.2226138
ZBTB32	null	null	null	-3.2226138
ZNF560	null	null	null	-3.2226138
NAPSA	null	null	null	-3.2114038
C20orf141	null	null	null	-3.2088127
ODF3B	null	null	null	-3.2083318
SLC38A5	null	null	null	-3.2055264
AIM2	null	null	null	-3.2026122
FAM153A	null	null	null	-3.2026122
LINC02568	null	null	null	-3.2026122
MED12L	null	null	null	-3.2026122
PRKG1	null	null	null	-3.2026122
RHOH	null	null	null	-3.2026122
SPRR2D	null	null	null	-3.2026122
ZNF341-AS1	null	null	null	-3.2026122
CYP4A22-AS1	null	null	null	-3.2026
PTGIR	null	null	null	-3.200092
RIMKLA	null	null	null	-3.1906884
IFITM1	null	null	null	-3.1899364
LINC02029	null	null	null	-3.1886895
BASP1-AS1	null	null	null	-3.175254
ADGRE4P	null	null	null	-3.1701229
ALDH1L1	null	null	null	-3.1701229
ATP6V1C2	null	null	null	-3.1701229
C2orf73	null	null	null	-3.1701229
CACNA1C	null	null	null	-3.1701229
CCL4L2	null	null	null	-3.1701229
CEACAMP10	null	null	null	-3.1701229
CHCHD2P2	null	null	null	-3.1701229
CHDH	null	null	null	-3.1701229
CNN1	null	null	null	-3.1701229
DACT3-AS1	null	null	null	-3.1701229
DMGDH	null	null	null	-3.1701229
EEF1DP7	null	null	null	-3.1701229
GJC3	null	null	null	-3.1701229
HMGB3P22	null	null	null	-3.1701229
IGBP1P4	null	null	null	-3.1701229
KCNK13	null	null	null	-3.1701229
KIF1A	null	null	null	-3.1701229
LAX1	null	null	null	-3.1701229
LINC01844	null	null	null	-3.1701229
MC4R	null	null	null	-3.1701229
MGAM2	null	null	null	-3.1701229
MIR3657	null	null	null	-3.1701229
MYL1	null	null	null	-3.1701229
MYL6P2	null	null	null	-3.1701229
PCDHGB8P	null	null	null	-3.1701229
PTGS2	null	null	null	-3.1701229
RAD1P2	null	null	null	-3.1701229
RASGRP1	null	null	null	-3.1701229
RNU1-16P	null	null	null	-3.1701229
RPSAP13	null	null	null	-3.1701229
RYR3	null	null	null	-3.1701229
SCARNA5	null	null	null	-3.1701229
SDHCP4	null	null	null	-3.1701229
SLC10A6	null	null	null	-3.1701229
SLC9A4	null	null	null	-3.1701229
SNORD62A	null	null	null	-3.1701229
TDRD6	null	null	null	-3.1701229
TES	null	null	null	-3.1701229
TP73-AS1	null	null	null	-3.1701229
TTLL6	null	null	null	-3.1701229
YWHAEP1	null	null	null	-3.1701229
ZBTB44-DT	null	null	null	-3.1701229
GBP5	null	null	null	-3.156474
CCL5	null	null	null	-3.1447732
CHST15	null	null	null	-3.1334476
DNAH12	null	null	null	-3.131569
GPR87	null	null	null	-3.131569
ARHGAP6	null	null	null	-3.1070867
SLC1A2	null	null	null	-3.083026
TGFB3-AS1	null	null	null	-3.083026
LRIG2-DT	null	null	null	-3.0827549
NPM1P26	null	null	null	-3.0827549
DMKN	null	null	null	-3.0825002
FBN2	null	null	null	-3.0815175
STAT4	null	null	null	-3.0774298
ABCC6P2	null	null	null	-3.0750458
SLAMF7	null	null	null	-3.0744176
ACTG2	null	null	null	-3.0742905
NEURL1	null	null	null	-3.0742905
NGF-AS1	null	null	null	-3.0742905
TUSC3	null	null	null	-3.0742905
C22orf24	null	null	null	-3.0721855
RASSF2	null	null	null	-3.0721855
NR5A2	null	null	null	-3.0628624
IFI27	null	null	null	-3.0523818
NAT2	null	null	null	-3.0330236
PPFIBP2	null	null	null	-3.0330236
IL1RL1	null	null	null	-3.0289307
MX2	null	null	null	-3.0288906
LINC00327	null	null	null	-3.0162632
IL10RA	null	null	null	-3.0072107
GRK3	null	null	null	-2.9989934
C1S	null	null	null	-2.9973943
DNAI1	null	null	null	-2.9768374
RINL	null	null	null	-2.9690175
PPM1J	null	null	null	-2.9567456
MYO16	null	null	null	-2.947089
LINC01363	null	null	null	-2.9453201
PLP1	null	null	null	-2.9453201
WDR45BP1	null	null	null	-2.9453201
CHRNA9	null	null	null	-2.9448266
MARCO	null	null	null	-2.9448266
MTTP	null	null	null	-2.9448266
IL12B	null	null	null	-2.9433267
PRKCB	null	null	null	-2.9433267
TH	null	null	null	-2.930704
ARHGAP30	null	null	null	-2.92323
TNFSF14	null	null	null	-2.922639
ACTBP7	null	null	null	-2.9193645
CFAP52	null	null	null	-2.9193645
IGFBP5	null	null	null	-2.9183414
EIF1P7	null	null	null	-2.9175818
CHMP1B-AS1	null	null	null	-2.9067607
SBSN	null	null	null	-2.9038744
CHAC1	null	null	null	-2.902278
ABCA1	null	null	null	-2.8991673
RAP1GAP	null	null	null	-2.8957522
XKR3	null	null	null	-2.8880877
MAGEA5	null	null	null	-2.8860922
MEI1	null	null	null	-2.8713498
PPIAP8	null	null	null	-2.868412
LAPTM5	null	null	null	-2.8624492
RAP1AP	null	null	null	-2.8578005
NRXN3	null	null	null	-2.8576264
LDHC	null	null	null	-2.8421173
ST6GALNAC2	null	null	null	-2.8421173
ZAP70	null	null	null	-2.8421173
FAM81B	null	null	null	-2.8420732
SGK2	null	null	null	-2.8420732
SLC4A5	null	null	null	-2.8420732
ABHD17AP1	null	null	null	-2.8419185
HAPLN3	null	null	null	-2.8405657
CD52	null	null	null	-2.8389342
RAB9B	null	null	null	-2.8376782
GPRC5D-AS1	null	null	null	-2.8305848
SYT12	null	null	null	-2.8257813
PADI4	null	null	null	-2.8257325
AADAC	null	null	null	-2.8251703
ADM2	null	null	null	-2.8251703
ARHGAP15	null	null	null	-2.8251703
ATP5MC1P4	null	null	null	-2.8251703
C1GALT1P1	null	null	null	-2.8251703
CALY	null	null	null	-2.8251703
CCL24	null	null	null	-2.8251703
CCNL2P1	null	null	null	-2.8251703
FETUB	null	null	null	-2.8251703
FGG	null	null	null	-2.8251703
GALR2	null	null	null	-2.8251703
GAPDHP68	null	null	null	-2.8251703
GIMAP1	null	null	null	-2.8251703
GNG7	null	null	null	-2.8251703
HIPK4	null	null	null	-2.8251703
HMGA1P4	null	null	null	-2.8251703
HNRNPA3P7	null	null	null	-2.8251703
ITIH3	null	null	null	-2.8251703
JAML	null	null	null	-2.8251703
KRT42P	null	null	null	-2.8251703
LINC01869	null	null	null	-2.8251703
MUC5AC	null	null	null	-2.8251703
MYH7	null	null	null	-2.8251703
MYL2	null	null	null	-2.8251703
NPNT	null	null	null	-2.8251703
PIK3AP1	null	null	null	-2.8251703
PPP1R1C	null	null	null	-2.8251703
PSG6	null	null	null	-2.8251703
RN7SL454P	null	null	null	-2.8251703
SERPINB10	null	null	null	-2.8251703
SIGLEC7	null	null	null	-2.8251703
SIRLNT	null	null	null	-2.8251703
SLC17A9	null	null	null	-2.8251703
SLC26A8	null	null	null	-2.8251703
SNORD41	null	null	null	-2.8251703
TCF3P1	null	null	null	-2.8251703
TIGIT	null	null	null	-2.8251703
TMPRSS7	null	null	null	-2.8251703
TRGC2	null	null	null	-2.8251703
VSIR	null	null	null	-2.8251703
WNT2	null	null	null	-2.8251703
ZBP1	null	null	null	-2.8251703
HOPX	null	null	null	-2.8209906
KEL	null	null	null	-2.8157887
NPC1L1	null	null	null	-2.8157887
SAMSN1	null	null	null	-2.8157887
SIT1	null	null	null	-2.8157887
TMOD1	null	null	null	-2.8157887
GIPR	null	null	null	-2.8147607
LUARIS	null	null	null	-2.8147607
ENTPD1	null	null	null	-2.814518
SP3P	null	null	null	-2.7898471
MEIS3P1	null	null	null	-2.7885275
LINC00939	null	null	null	-2.7862182
RRAD	null	null	null	-2.7807372
ALS2CL	null	null	null	-2.772947
SPINT2	null	null	null	-2.7721393
LINC01541	null	null	null	-2.7638497
CADM4	null	null	null	-2.7554574
LUCAT1	null	null	null	-2.7546196
CD8A	null	null	null	-2.7527232
S100A11P1	null	null	null	-2.7512739
C11orf44	null	null	null	-2.7495425
UPK1A	null	null	null	-2.7379081
HOXB9	null	null	null	-2.7365086
AP3B2	null	null	null	-2.7205648
FOXD1-AS1	null	null	null	-2.7205648
LINC01686	null	null	null	-2.7205648
RPL23AP34	null	null	null	-2.7205648
TSPEAR-AS1	null	null	null	-2.7205648
FNTAP2	null	null	null	-2.7203972
FAM131B	null	null	null	-2.7083771
IGF2	null	null	null	-2.702665
AMTN	null	null	null	-2.6993837
GK2	null	null	null	-2.6959708
INHBA	null	null	null	-2.6928117
SLC16A12	null	null	null	-2.6870816
STXBP6	null	null	null	-2.6695375
KCNK3	null	null	null	-2.6649804
NPIPB12	null	null	null	-2.6586344
CYB5R2	null	null	null	-2.657105
KLHL2P1	null	null	null	-2.6507685
LINC00545	null	null	null	-2.6507685
LTB	null	null	null	-2.6507685
LINC01638	null	null	null	-2.6464996
LIMCH1	null	null	null	-2.6460495
INCA1	null	null	null	-2.6444063
LINC00880	null	null	null	-2.6427896
MAPK8IP2	null	null	null	-2.6427896
TNN	null	null	null	-2.6427896
C7orf57	null	null	null	-2.639764
SYS1-DBNDD2	null	null	null	-2.6381626
TRBC2	null	null	null	-2.6338468
HAVCR2	null	null	null	-2.6330497
ARMH1	null	null	null	-2.6287527
LINC00942	null	null	null	-2.6287527
HIST2H2AB	null	null	null	-2.6245615
HMGB1P1	null	null	null	-2.6245615
SH3GL1P2	null	null	null	-2.6245615
SIM1	null	null	null	-2.6245615
SLC49A3	null	null	null	-2.6245615
SNORA14A	null	null	null	-2.6245615
TRPV3	null	null	null	-2.6243045
10-Mar	null	null	null	-2.623402
C9orf139	null	null	null	-2.623402
FNDC7	null	null	null	-2.623402
PPP2R2C	null	null	null	-2.623402
SMILR	null	null	null	-2.623402
CXCL11	null	null	null	-2.623269
SH2D3C	null	null	null	-2.623269
CDH26	null	null	null	-2.619443
HEPH	null	null	null	-2.619443
JPH4	null	null	null	-2.619443
KRT7-AS	null	null	null	-2.619443
RIPOR2	null	null	null	-2.619443
COL8A2	null	null	null	-2.6178682
PTGES	null	null	null	-2.6163876
CTSW	null	null	null	-2.6082585
RARB	null	null	null	-2.6058927
LCP2	null	null	null	-2.599377
LINC01592	null	null	null	-2.5972788
PYGM	null	null	null	-2.5927198
C6orf52	null	null	null	-2.586901
GALC	null	null	null	-2.586901
PRELP	null	null	null	-2.586901
SNX10	null	null	null	-2.586901
MRPL45P1	null	null	null	-2.586507
OR10Y1P	null	null	null	-2.586507
P2RY6	null	null	null	-2.586507
ANXA10	null	null	null	-2.5843146
BOLA3P3	null	null	null	-2.5843146
CEMIP	null	null	null	-2.5843146
LINC01730	null	null	null	-2.5843146
PDE4C	null	null	null	-2.5843146
CACNA1A	null	null	null	-2.583609
DPH6-DT	null	null	null	-2.583609
SSMEM1	null	null	null	-2.583609
ST13P20	null	null	null	-2.583609
PDE6A	null	null	null	-2.579247
CD36	null	null	null	-2.5756893
LNCOC1	null	null	null	-2.5737863
TRIML2	null	null	null	-2.5726326
CD3E	null	null	null	-2.5687602
RASD2	null	null	null	-2.5668592
C7orf69	null	null	null	-2.5618048
ACPP	null	null	null	-2.5606878
KRT34	null	null	null	-2.559265
NTN4	null	null	null	-2.5568097
SERPINB4	null	null	null	-2.5558772
ABAT	null	null	null	-2.5431917
ABCC6P1	null	null	null	-2.5431917
ACTN3	null	null	null	-2.5431917
ADD2	null	null	null	-2.5431917
ADRA2A	null	null	null	-2.5431917
AIF1	null	null	null	-2.5431917
ALDH3B2	null	null	null	-2.5431917
ALPL	null	null	null	-2.5431917
APOA1-AS	null	null	null	-2.5431917
ARL5C	null	null	null	-2.5431917
ASB4	null	null	null	-2.5431917
ASNSP3	null	null	null	-2.5431917
AZGP1	null	null	null	-2.5431917
AZU1	null	null	null	-2.5431917
BCRP9	null	null	null	-2.5431917
C1QTNF9B	null	null	null	-2.5431917
C9orf152	null	null	null	-2.5431917
CACNA1B	null	null	null	-2.5431917
CACTIN-AS1	null	null	null	-2.5431917
CAMK2A	null	null	null	-2.5431917
CBLC	null	null	null	-2.5431917
CCDC177	null	null	null	-2.5431917
CCDC200	null	null	null	-2.5431917
CD207	null	null	null	-2.5431917
CD300LB	null	null	null	-2.5431917
CD4	null	null	null	-2.5431917
CDC42P5	null	null	null	-2.5431917
CDCP2	null	null	null	-2.5431917
CEACAMP8	null	null	null	-2.5431917
CFL1P6	null	null	null	-2.5431917
CGA	null	null	null	-2.5431917
CHN2	null	null	null	-2.5431917
CHRNA3	null	null	null	-2.5431917
CLEC5A	null	null	null	-2.5431917
CNGA1	null	null	null	-2.5431917
CNN2P6	null	null	null	-2.5431917
CNTD2	null	null	null	-2.5431917
CPA1	null	null	null	-2.5431917
CRCT1	null	null	null	-2.5431917
CRH	null	null	null	-2.5431917
CRISPLD1	null	null	null	-2.5431917
CXCL10	null	null	null	-2.5431917
CXXC5-AS1	null	null	null	-2.5431917
CYP17A1	null	null	null	-2.5431917
CYP4B1	null	null	null	-2.5431917
CYP4F11	null	null	null	-2.5431917
DGCR9	null	null	null	-2.5431917
DLGAP1-AS3	null	null	null	-2.5431917
DLX2-DT	null	null	null	-2.5431917
DMBX1	null	null	null	-2.5431917
DNASE1L3	null	null	null	-2.5431917
DOK2	null	null	null	-2.5431917
DUOX2	null	null	null	-2.5431917
DUOXA1	null	null	null	-2.5431917
DUTP4	null	null	null	-2.5431917
EDARADD	null	null	null	-2.5431917
ELOCP28	null	null	null	-2.5431917
EPHA3	null	null	null	-2.5431917
FAM169A	null	null	null	-2.5431917
FAM27C	null	null	null	-2.5431917
FATE1	null	null	null	-2.5431917
FBXO40	null	null	null	-2.5431917
FCAMR	null	null	null	-2.5431917
FCGR2C	null	null	null	-2.5431917
FOLR3	null	null	null	-2.5431917
FRG2B	null	null	null	-2.5431917
GFRA1	null	null	null	-2.5431917
GGT8P	null	null	null	-2.5431917
GP5	null	null	null	-2.5431917
GPR179	null	null	null	-2.5431917
GRXCR1	null	null	null	-2.5431917
GSN-AS1	null	null	null	-2.5431917
HAO2	null	null	null	-2.5431917
HHIPL1	null	null	null	-2.5431917
HIGD1AP8	null	null	null	-2.5431917
HIGD2B	null	null	null	-2.5431917
HIST1H2BB	null	null	null	-2.5431917
HMGB3P31	null	null	null	-2.5431917
HNF1A	null	null	null	-2.5431917
HORMAD2	null	null	null	-2.5431917
HS6ST2	null	null	null	-2.5431917
HS6ST3	null	null	null	-2.5431917
HTR2A	null	null	null	-2.5431917
HTR3B	null	null	null	-2.5431917
HYDIN	null	null	null	-2.5431917
IL18	null	null	null	-2.5431917
IL18RAP	null	null	null	-2.5431917
IQCM	null	null	null	-2.5431917
ISL1	null	null	null	-2.5431917
ITGB2-AS1	null	null	null	-2.5431917
KCNK1	null	null	null	-2.5431917
KIF2B	null	null	null	-2.5431917
KRTAP5-9	null	null	null	-2.5431917
LAP3P1	null	null	null	-2.5431917
LBP	null	null	null	-2.5431917
LDHAP1	null	null	null	-2.5431917
LINC00161	null	null	null	-2.5431917
LINC00501	null	null	null	-2.5431917
LINC01235	null	null	null	-2.5431917
LINC01257	null	null	null	-2.5431917
LINC01361	null	null	null	-2.5431917
LINC01422	null	null	null	-2.5431917
LINC01449	null	null	null	-2.5431917
LINC01516	null	null	null	-2.5431917
LINC01862	null	null	null	-2.5431917
LINC01961	null	null	null	-2.5431917
LINC02030	null	null	null	-2.5431917
LINC02223	null	null	null	-2.5431917
LINC02360	null	null	null	-2.5431917
LINC02383	null	null	null	-2.5431917
LINC02426	null	null	null	-2.5431917
LINC02444	null	null	null	-2.5431917
LINC02828	null	null	null	-2.5431917
LRAT	null	null	null	-2.5431917
LYG2	null	null	null	-2.5431917
MAT1A	null	null	null	-2.5431917
MIR365A	null	null	null	-2.5431917
MIR6775	null	null	null	-2.5431917
MIR941-4	null	null	null	-2.5431917
MRAP2	null	null	null	-2.5431917
MTND2P32	null	null	null	-2.5431917
MTNR1A	null	null	null	-2.5431917
MUC5B-AS1	null	null	null	-2.5431917
MYH6	null	null	null	-2.5431917
MYO3B	null	null	null	-2.5431917
NEBL	null	null	null	-2.5431917
NIBAN3	null	null	null	-2.5431917
NKPD1	null	null	null	-2.5431917
NPAP1P2	null	null	null	-2.5431917
NPFFR2	null	null	null	-2.5431917
NPW	null	null	null	-2.5431917
NPY4R	null	null	null	-2.5431917
NR1I2	null	null	null	-2.5431917
NRCAM	null	null	null	-2.5431917
NSFP1	null	null	null	-2.5431917
NSG2	null	null	null	-2.5431917
NT5C1B	null	null	null	-2.5431917
NUTM2F	null	null	null	-2.5431917
OCSTAMP	null	null	null	-2.5431917
OPCML	null	null	null	-2.5431917
OR7E130P	null	null	null	-2.5431917
OR7E19P	null	null	null	-2.5431917
OSM	null	null	null	-2.5431917
OTOF	null	null	null	-2.5431917
OTX2-AS1	null	null	null	-2.5431917
PACRG-AS1	null	null	null	-2.5431917
PANX3	null	null	null	-2.5431917
PGAM1P6	null	null	null	-2.5431917
PLEKHG4B	null	null	null	-2.5431917
PLK5	null	null	null	-2.5431917
PLXDC2	null	null	null	-2.5431917
PNPLA5	null	null	null	-2.5431917
PPBP	null	null	null	-2.5431917
PPIAP33	null	null	null	-2.5431917
PREX2	null	null	null	-2.5431917
PRMT8	null	null	null	-2.5431917
PROS2P	null	null	null	-2.5431917
RAG2	null	null	null	-2.5431917
RANP4	null	null	null	-2.5431917
REN	null	null	null	-2.5431917
RN7SKP30	null	null	null	-2.5431917
RN7SKP56	null	null	null	-2.5431917
RN7SL505P	null	null	null	-2.5431917
RNU6-1088P	null	null	null	-2.5431917
RNU6-1157P	null	null	null	-2.5431917
RNU6-130P	null	null	null	-2.5431917
ROR1	null	null	null	-2.5431917
RPL21P116	null	null	null	-2.5431917
RPL22P19	null	null	null	-2.5431917
RPL30P11	null	null	null	-2.5431917
RPL39P	null	null	null	-2.5431917
RPL6P9	null	null	null	-2.5431917
RPL7P4	null	null	null	-2.5431917
RPS29P19	null	null	null	-2.5431917
RPS6KB2-AS1	null	null	null	-2.5431917
RRH	null	null	null	-2.5431917
S1PR4	null	null	null	-2.5431917
SAMD12-AS1	null	null	null	-2.5431917
SCN2B	null	null	null	-2.5431917
SEM1P1	null	null	null	-2.5431917
SERPINA9	null	null	null	-2.5431917
SIRPB2	null	null	null	-2.5431917
SLC22A23	null	null	null	-2.5431917
SLC2A5	null	null	null	-2.5431917
SLC38A3	null	null	null	-2.5431917
SLITRK4	null	null	null	-2.5431917
SLX1A	null	null	null	-2.5431917
SMC1B	null	null	null	-2.5431917
SNORA63C	null	null	null	-2.5431917
SNORD11B	null	null	null	-2.5431917
SNORD123	null	null	null	-2.5431917
SNORD42B	null	null	null	-2.5431917
SNTG2	null	null	null	-2.5431917
SOX6	null	null	null	-2.5431917
SPATA31E1	null	null	null	-2.5431917
ST3GAL1P1	null	null	null	-2.5431917
ST6GALNAC5	null	null	null	-2.5431917
SUCNR1	null	null	null	-2.5431917
SULT1C2P1	null	null	null	-2.5431917
SULT4A1	null	null	null	-2.5431917
SUMO2P6	null	null	null	-2.5431917
SYCE3	null	null	null	-2.5431917
TAF9P3	null	null	null	-2.5431917
TAT	null	null	null	-2.5431917
TBC1D29P	null	null	null	-2.5431917
TBX4	null	null	null	-2.5431917
TEX13B	null	null	null	-2.5431917
TFF2	null	null	null	-2.5431917
TPH2	null	null	null	-2.5431917
TRBV7-3	null	null	null	-2.5431917
TRIM31-AS1	null	null	null	-2.5431917
TRIM36-IT1	null	null	null	-2.5431917
TTC4P1	null	null	null	-2.5431917
UGT1A7	null	null	null	-2.5431917
VN2R19P	null	null	null	-2.5431917
WDR87	null	null	null	-2.5431917
ZAN	null	null	null	-2.5431917
ZNF192P2	null	null	null	-2.5431917
ZNF280A	null	null	null	-2.5431917
ZNF331	null	null	null	-2.5431917
ZNF354A	null	null	null	-2.5431917
ZNF595	null	null	null	-2.5431917
ZNF880	null	null	null	-2.5431917
PTPN7	null	null	null	-2.5379007
CELF2	null	null	null	-2.5378952
IGSF9B	null	null	null	-2.5373924
ACSL6	null	null	null	-2.5364175
ADAMDEC1	null	null	null	-2.5364175
ADAP2	null	null	null	-2.5364175
ADGRG3	null	null	null	-2.5364175
ADGRG4	null	null	null	-2.5364175
ADORA3	null	null	null	-2.5364175
AFF2	null	null	null	-2.5364175
AGGF1P9	null	null	null	-2.5364175
AGRP	null	null	null	-2.5364175
ALG1L	null	null	null	-2.5364175
ALOX15	null	null	null	-2.5364175
AOX2P	null	null	null	-2.5364175
ARHGAP26-AS1	null	null	null	-2.5364175
ASTN1	null	null	null	-2.5364175
ATP1B2	null	null	null	-2.5364175
BCAP31P1	null	null	null	-2.5364175
BCRP3	null	null	null	-2.5364175
BMP8A	null	null	null	-2.5364175
BRWD1-AS1	null	null	null	-2.5364175
BTNL3	null	null	null	-2.5364175
C11orf86	null	null	null	-2.5364175
C11orf96	null	null	null	-2.5364175
C17orf98	null	null	null	-2.5364175
C1QTNF1-AS1	null	null	null	-2.5364175
C22orf34	null	null	null	-2.5364175
C9	null	null	null	-2.5364175
CABP4	null	null	null	-2.5364175
CBX5P1	null	null	null	-2.5364175
CD209	null	null	null	-2.5364175
CDK5P1	null	null	null	-2.5364175
CDSN	null	null	null	-2.5364175
CES4A	null	null	null	-2.5364175
CETP	null	null	null	-2.5364175
CHGB	null	null	null	-2.5364175
CNTN6	null	null	null	-2.5364175
CPSF4L	null	null	null	-2.5364175
CSPG4P12	null	null	null	-2.5364175
CYP19A1	null	null	null	-2.5364175
CYP2G1P	null	null	null	-2.5364175
CYP4F3	null	null	null	-2.5364175
DIRC1	null	null	null	-2.5364175
DNAH9	null	null	null	-2.5364175
DUSP15	null	null	null	-2.5364175
DYDC2	null	null	null	-2.5364175
EEF1A1P17	null	null	null	-2.5364175
EFCAB6	null	null	null	-2.5364175
EFCAB9	null	null	null	-2.5364175
EFHD1	null	null	null	-2.5364175
ELF2P3	null	null	null	-2.5364175
FAM220CP	null	null	null	-2.5364175
FAM71A	null	null	null	-2.5364175
FAM83C	null	null	null	-2.5364175
FCF1P3	null	null	null	-2.5364175
FGB	null	null	null	-2.5364175
FRG2FP	null	null	null	-2.5364175
GAPDHP46	null	null	null	-2.5364175
GAPDHP61	null	null	null	-2.5364175
GEMIN8P2	null	null	null	-2.5364175
GJA5	null	null	null	-2.5364175
GLB1L2	null	null	null	-2.5364175
GPR15	null	null	null	-2.5364175
GRM5	null	null	null	-2.5364175
GRPEL2P1	null	null	null	-2.5364175
H3F3BP1	null	null	null	-2.5364175
HAO1	null	null	null	-2.5364175
HIST1H2AJ	null	null	null	-2.5364175
HIST1H2APS3	null	null	null	-2.5364175
HMGN2P46	null	null	null	-2.5364175
HSPA12B	null	null	null	-2.5364175
IGF2-AS	null	null	null	-2.5364175
IGFBP2	null	null	null	-2.5364175
IGLL3P	null	null	null	-2.5364175
IQCJ-SCHIP1-AS1	null	null	null	-2.5364175
KCNJ13	null	null	null	-2.5364175
KCNK6	null	null	null	-2.5364175
KCNN1	null	null	null	-2.5364175
KCP	null	null	null	-2.5364175
KRTAP4-11	null	null	null	-2.5364175
LAMP3	null	null	null	-2.5364175
LARGE2	null	null	null	-2.5364175
LEFTY2	null	null	null	-2.5364175
LGALS12	null	null	null	-2.5364175
LHFPL1	null	null	null	-2.5364175
LINC00595	null	null	null	-2.5364175
LINC00678	null	null	null	-2.5364175
LINC00968	null	null	null	-2.5364175
LINC01093	null	null	null	-2.5364175
LINC01550	null	null	null	-2.5364175
LINC01733	null	null	null	-2.5364175
LINC01788	null	null	null	-2.5364175
LINC01934	null	null	null	-2.5364175
LINC02269	null	null	null	-2.5364175
LINC02435	null	null	null	-2.5364175
LINC02594	null	null	null	-2.5364175
LINC02757	null	null	null	-2.5364175
LNCAROD	null	null	null	-2.5364175
LRIT3	null	null	null	-2.5364175
LRRC25	null	null	null	-2.5364175
LYN	null	null	null	-2.5364175
MAGEB18	null	null	null	-2.5364175
MAPK15	null	null	null	-2.5364175
MIR301A	null	null	null	-2.5364175
MIR3613	null	null	null	-2.5364175
MIR455	null	null	null	-2.5364175
MIR491	null	null	null	-2.5364175
MIR561	null	null	null	-2.5364175
MIR6514	null	null	null	-2.5364175
MIR6757	null	null	null	-2.5364175
MORC1	null	null	null	-2.5364175
MSC	null	null	null	-2.5364175
MTCO2P19	null	null	null	-2.5364175
MYH14	null	null	null	-2.5364175
MYRIP	null	null	null	-2.5364175
NAP1L4P2	null	null	null	-2.5364175
NCF4	null	null	null	-2.5364175
NCMAP	null	null	null	-2.5364175
NFU1P2	null	null	null	-2.5364175
NKX1-1	null	null	null	-2.5364175
NPM1P38	null	null	null	-2.5364175
NRN1L	null	null	null	-2.5364175
NTF6B	null	null	null	-2.5364175
ODAPH	null	null	null	-2.5364175
OPN5	null	null	null	-2.5364175
OR10J6P	null	null	null	-2.5364175
OR2AF1P	null	null	null	-2.5364175
OR6E1P	null	null	null	-2.5364175
OR7D2	null	null	null	-2.5364175
OSTN-AS1	null	null	null	-2.5364175
PADI2	null	null	null	-2.5364175
PAGE3	null	null	null	-2.5364175
PAX7	null	null	null	-2.5364175
PDE9A	null	null	null	-2.5364175
PGPEP1L	null	null	null	-2.5364175
PKDREJ	null	null	null	-2.5364175
PKP1	null	null	null	-2.5364175
PLAGL1	null	null	null	-2.5364175
PLCB4	null	null	null	-2.5364175
PLCE1-AS1	null	null	null	-2.5364175
PLEK	null	null	null	-2.5364175
PLEKHG1	null	null	null	-2.5364175
PLIN5	null	null	null	-2.5364175
PNMA8A	null	null	null	-2.5364175
POTEI	null	null	null	-2.5364175
PPEF1	null	null	null	-2.5364175
PRKAG2-AS1	null	null	null	-2.5364175
QRFPR	null	null	null	-2.5364175
RN7SL273P	null	null	null	-2.5364175
RN7SL559P	null	null	null	-2.5364175
RN7SL648P	null	null	null	-2.5364175
RNA5SP535	null	null	null	-2.5364175
RNF180	null	null	null	-2.5364175
RNU4ATAC15P	null	null	null	-2.5364175
RNU6-826P	null	null	null	-2.5364175
RNU6-858P	null	null	null	-2.5364175
RNU6-94P	null	null	null	-2.5364175
RPL34P1	null	null	null	-2.5364175
RPL36AP51	null	null	null	-2.5364175
RPS23P6	null	null	null	-2.5364175
RPS4XP21	null	null	null	-2.5364175
SAMD5	null	null	null	-2.5364175
SCN1A	null	null	null	-2.5364175
SEMA4G	null	null	null	-2.5364175
SEPTIN12	null	null	null	-2.5364175
SIGLEC1	null	null	null	-2.5364175
SIGLEC9	null	null	null	-2.5364175
SLC10A5P1	null	null	null	-2.5364175
SLC39A12	null	null	null	-2.5364175
SLCO6A1	null	null	null	-2.5364175
SLFN12L	null	null	null	-2.5364175
SMCO1	null	null	null	-2.5364175
SNORA79B	null	null	null	-2.5364175
SNORD127	null	null	null	-2.5364175
SOX5	null	null	null	-2.5364175
SPINK4	null	null	null	-2.5364175
ST8SIA6	null	null	null	-2.5364175
SVIP	null	null	null	-2.5364175
TACR3	null	null	null	-2.5364175
TBC1D26	null	null	null	-2.5364175
TMEM108	null	null	null	-2.5364175
TMEM246	null	null	null	-2.5364175
TMEM97P1	null	null	null	-2.5364175
TRBV11-2	null	null	null	-2.5364175
TRBV7-9	null	null	null	-2.5364175
TRGV10	null	null	null	-2.5364175
TSIX	null	null	null	-2.5364175
TSPAN15	null	null	null	-2.5364175
UBBP1	null	null	null	-2.5364175
UBE2NP1	null	null	null	-2.5364175
UBE2WP1	null	null	null	-2.5364175
USP44	null	null	null	-2.5364175
WNK2	null	null	null	-2.5364175
YBX1P8	null	null	null	-2.5364175
ZNF468	null	null	null	-2.5364175
ZNF527	null	null	null	-2.5364175
ZNF648	null	null	null	-2.5364175
ZNF701	null	null	null	-2.5364175
ZNF823	null	null	null	-2.5364175
ZNF850	null	null	null	-2.5364175
IL32	null	null	null	-2.5324028
LINC01694	null	null	null	-2.5268528
TNFRSF9	null	null	null	-2.5182273
MYOZ2	null	null	null	-2.5154855
GCOM1	null	null	null	-2.5139751
LCP1	null	null	null	-2.5094104
RASGRP2	null	null	null	-2.5065331
SORL1	null	null	null	-2.5065331
DOCK8	null	null	null	-2.5055983
EGOT	null	null	null	-2.5055983
RPL5P9	null	null	null	-2.5053787
SEPTIN4-AS1	null	null	null	-2.5053787
MIR210	null	null	null	-2.5049245
MYH2	null	null	null	-2.5049245
MYO1F	null	null	null	-2.5049245
RPS26P21	null	null	null	-2.5049245
SOHLH2	null	null	null	-2.5049245
TRIM73	null	null	null	-2.5049245
NBPF6	null	null	null	-2.5044568
RAB11FIP1	null	null	null	-2.5031972
LINC02256	null	null	null	-2.5031652
RSPH6A	null	null	null	-2.5031652
ACSM3	null	null	null	-2.4930048
EBI3	null	null	null	-2.492134
AQP3	null	null	null	-2.4851549
DUSP27	null	null	null	-2.4827166
CAMK2B	null	null	null	-2.475823
CSF2	null	null	null	-2.4757473
CSGALNACT1	null	null	null	-2.4617803
DNAH10	null	null	null	-2.455465
EEF1A1P29	null	null	null	-2.4541154
AIF1L	null	null	null	-2.451185
BDNF-AS	null	null	null	-2.4462903
ANKRD31	null	null	null	-2.4424284
SPATA3-AS1	null	null	null	-2.4424284
CATSPERE	null	null	null	-2.4368865
PSG1	null	null	null	-2.4332724
NTRK3	null	null	null	-2.4216394
ACVRL1	null	null	null	-2.419805
FOXN3P1	null	null	null	-2.419805
SNX6P1	null	null	null	-2.419805
TYMP	null	null	null	-2.399228
RRS1-AS1	null	null	null	-2.3945556
HNRNPA1P52	null	null	null	-2.392552
EIF4BP7	null	null	null	-2.38535
C21orf62-AS1	null	null	null	-2.3850043
CGB8	null	null	null	-2.3797302
TTLL9	null	null	null	-2.3776202
AMDHD1	null	null	null	-2.3746188
GJC2	null	null	null	-2.364477
IL7R	null	null	null	-2.3623433
MT1G	null	null	null	-2.360155
TNFSF10	null	null	null	-2.3596807
BTLA	null	null	null	-2.358447
FBLN7	null	null	null	-2.358447
TMEM191C	null	null	null	-2.358447
CFB	null	null	null	-2.3574612
GRHL3	null	null	null	-2.356312
DIRC3	null	null	null	-2.3542855
AKR1B10	null	null	null	-2.353157
SEMA5B	null	null	null	-2.3518658
NEB	null	null	null	-2.346001
NUP210	null	null	null	-2.3458521
CD5	null	null	null	-2.3354576
OSCAR	null	null	null	-2.323103
GCNT3	null	null	null	-2.310005
ACSBG2	null	null	null	-2.3094077
ACTL7B	null	null	null	-2.3094077
ADGRF2	null	null	null	-2.3094077
ADIPOQ	null	null	null	-2.3094077
AFM	null	null	null	-2.3094077
AGAP11	null	null	null	-2.3094077
AGT	null	null	null	-2.3094077
AIFM3	null	null	null	-2.3094077
AKR1B15	null	null	null	-2.3094077
ALDH5A1	null	null	null	-2.3094077
ALG1L8P	null	null	null	-2.3094077
AMD1P2	null	null	null	-2.3094077
APOBEC3H	null	null	null	-2.3094077
AQP7P1	null	null	null	-2.3094077
ARHGEF26-AS1	null	null	null	-2.3094077
ARL2BPP5	null	null	null	-2.3094077
ARMC4	null	null	null	-2.3094077
ARPC3P5	null	null	null	-2.3094077
ASB14	null	null	null	-2.3094077
ATP1B1P1	null	null	null	-2.3094077
ATP5MC1P1	null	null	null	-2.3094077
ATP6V1G1P2	null	null	null	-2.3094077
BTBD6P1	null	null	null	-2.3094077
BTNL8	null	null	null	-2.3094077
C1orf127	null	null	null	-2.3094077
C1orf158	null	null	null	-2.3094077
C1QTNF7	null	null	null	-2.3094077
C20orf78	null	null	null	-2.3094077
C2orf16	null	null	null	-2.3094077
C4BPAP1	null	null	null	-2.3094077
C6orf201	null	null	null	-2.3094077
C9orf170	null	null	null	-2.3094077
CADPS	null	null	null	-2.3094077
CALR3	null	null	null	-2.3094077
CAMKV	null	null	null	-2.3094077
CBFA2T3	null	null	null	-2.3094077
CBX1P3	null	null	null	-2.3094077
CCL22	null	null	null	-2.3094077
CD19	null	null	null	-2.3094077
CD244	null	null	null	-2.3094077
CD5L	null	null	null	-2.3094077
CD80	null	null	null	-2.3094077
CDC27P2	null	null	null	-2.3094077
CDH1	null	null	null	-2.3094077
CDH17	null	null	null	-2.3094077
CELA2B	null	null	null	-2.3094077
CHRM1	null	null	null	-2.3094077
CHRNB2	null	null	null	-2.3094077
CHTF8P1	null	null	null	-2.3094077
CLDN10	null	null	null	-2.3094077
CLDN7	null	null	null	-2.3094077
CMPK2	null	null	null	-2.3094077
CPA2	null	null	null	-2.3094077
CREB3L3	null	null	null	-2.3094077
CTSE	null	null	null	-2.3094077
CTSH	null	null	null	-2.3094077
CXorf58	null	null	null	-2.3094077
CYCSP39	null	null	null	-2.3094077
CYP26A1	null	null	null	-2.3094077
DAPP1	null	null	null	-2.3094077
DCST1	null	null	null	-2.3094077
DDC	null	null	null	-2.3094077
DDX39B-AS1	null	null	null	-2.3094077
DENND5B-AS1	null	null	null	-2.3094077
DENND6A-DT	null	null	null	-2.3094077
DGKB	null	null	null	-2.3094077
DHRS4L1	null	null	null	-2.3094077
DLEC1	null	null	null	-2.3094077
DNAH8	null	null	null	-2.3094077
DPPA4	null	null	null	-2.3094077
DYNLRB2	null	null	null	-2.3094077
EDNRB	null	null	null	-2.3094077
EGF	null	null	null	-2.3094077
EIF4A1P1	null	null	null	-2.3094077
EIF4EBP2P2	null	null	null	-2.3094077
ENPEP	null	null	null	-2.3094077
EPHB1	null	null	null	-2.3094077
ERAS	null	null	null	-2.3094077
ERVMER34-1	null	null	null	-2.3094077
ERVV-2	null	null	null	-2.3094077
ESRP1	null	null	null	-2.3094077
FAM156A	null	null	null	-2.3094077
FAM157A	null	null	null	-2.3094077
FAM166B	null	null	null	-2.3094077
FAM41C	null	null	null	-2.3094077
FAM83B	null	null	null	-2.3094077
FAXDC2	null	null	null	-2.3094077
FCRL5	null	null	null	-2.3094077
FER1L6-AS2	null	null	null	-2.3094077
FLRT1	null	null	null	-2.3094077
FOXP3	null	null	null	-2.3094077
FRG2	null	null	null	-2.3094077
FRG2C	null	null	null	-2.3094077
FUCA1	null	null	null	-2.3094077
FZD10-AS1	null	null	null	-2.3094077
FZD9	null	null	null	-2.3094077
GABRB2	null	null	null	-2.3094077
GABRG3	null	null	null	-2.3094077
GABRP	null	null	null	-2.3094077
GALNT12	null	null	null	-2.3094077
GALNTL5	null	null	null	-2.3094077
GAP43	null	null	null	-2.3094077
GAPDHP52	null	null	null	-2.3094077
GAS2	null	null	null	-2.3094077
GCKR	null	null	null	-2.3094077
GLB1L3	null	null	null	-2.3094077
GLUD1P4	null	null	null	-2.3094077
GNAT1	null	null	null	-2.3094077
GP1BA	null	null	null	-2.3094077
GPR1-AS	null	null	null	-2.3094077
GPR62	null	null	null	-2.3094077
GPR65	null	null	null	-2.3094077
GPR84	null	null	null	-2.3094077
GRB14	null	null	null	-2.3094077
GRIA4	null	null	null	-2.3094077
GRIN2B	null	null	null	-2.3094077
GRIN2C	null	null	null	-2.3094077
HDAC11-AS1	null	null	null	-2.3094077
HIST1H2BPS2	null	null	null	-2.3094077
HIST1H2BPS3	null	null	null	-2.3094077
HLA-DPB1	null	null	null	-2.3094077
HMGA1P6	null	null	null	-2.3094077
HMGB1P17	null	null	null	-2.3094077
HMGB3P17	null	null	null	-2.3094077
HMGN1P24	null	null	null	-2.3094077
HNRNPA1P36	null	null	null	-2.3094077
HNRNPA1P66	null	null	null	-2.3094077
HOXC13-AS	null	null	null	-2.3094077
HPD	null	null	null	-2.3094077
HPSE2	null	null	null	-2.3094077
HRH2	null	null	null	-2.3094077
HSD11B1-AS1	null	null	null	-2.3094077
HSPE1P13	null	null	null	-2.3094077
HTR6	null	null	null	-2.3094077
ICAM2	null	null	null	-2.3094077
IFITM4P	null	null	null	-2.3094077
IGFBP3	null	null	null	-2.3094077
IGHG4	null	null	null	-2.3094077
IGHGP	null	null	null	-2.3094077
IGHV3-74	null	null	null	-2.3094077
IL24	null	null	null	-2.3094077
IL4	null	null	null	-2.3094077
IL5	null	null	null	-2.3094077
INO80B-WBP1	null	null	null	-2.3094077
INSL4	null	null	null	-2.3094077
IP6K3	null	null	null	-2.3094077
IRF5	null	null	null	-2.3094077
IRF7	null	null	null	-2.3094077
IRF8	null	null	null	-2.3094077
IRS3P	null	null	null	-2.3094077
IRX1	null	null	null	-2.3094077
KCNE3	null	null	null	-2.3094077
KCNG2	null	null	null	-2.3094077
KCNJ1	null	null	null	-2.3094077
KCNK15	null	null	null	-2.3094077
KCNMA1-AS1	null	null	null	-2.3094077
KLK1	null	null	null	-2.3094077
KRT18P14	null	null	null	-2.3094077
KRT8P50	null	null	null	-2.3094077
KSR2	null	null	null	-2.3094077
KY	null	null	null	-2.3094077
LAD1	null	null	null	-2.3094077
LARP1P1	null	null	null	-2.3094077
LGALSL-DT	null	null	null	-2.3094077
LILRB3	null	null	null	-2.3094077
LINC00364	null	null	null	-2.3094077
LINC00373	null	null	null	-2.3094077
LINC00426	null	null	null	-2.3094077
LINC00440	null	null	null	-2.3094077
LINC00470	null	null	null	-2.3094077
LINC00514	null	null	null	-2.3094077
LINC00571	null	null	null	-2.3094077
LINC00609	null	null	null	-2.3094077
LINC00865	null	null	null	-2.3094077
LINC01033	null	null	null	-2.3094077
LINC01106	null	null	null	-2.3094077
LINC01208	null	null	null	-2.3094077
LINC01283	null	null	null	-2.3094077
LINC01342	null	null	null	-2.3094077
LINC01392	null	null	null	-2.3094077
LINC01426	null	null	null	-2.3094077
LINC01474	null	null	null	-2.3094077
LINC01551	null	null	null	-2.3094077
LINC01634	null	null	null	-2.3094077
LINC01693	null	null	null	-2.3094077
LINC01705	null	null	null	-2.3094077
LINC01747	null	null	null	-2.3094077
LINC01763	null	null	null	-2.3094077
LINC01833	null	null	null	-2.3094077
LINC01836	null	null	null	-2.3094077
LINC01933	null	null	null	-2.3094077
LINC01936	null	null	null	-2.3094077
LINC01962	null	null	null	-2.3094077
LINC01968	null	null	null	-2.3094077
LINC02065	null	null	null	-2.3094077
LINC02073	null	null	null	-2.3094077
LINC02165	null	null	null	-2.3094077
LINC02177	null	null	null	-2.3094077
LINC02206	null	null	null	-2.3094077
LINC02277	null	null	null	-2.3094077
LINC02363	null	null	null	-2.3094077
LINC02395	null	null	null	-2.3094077
LINC02446	null	null	null	-2.3094077
LINC02501	null	null	null	-2.3094077
LINC02533	null	null	null	-2.3094077
LINC02716	null	null	null	-2.3094077
LINC02844	null	null	null	-2.3094077
LRMP	null	null	null	-2.3094077
LRRC37A	null	null	null	-2.3094077
LRRN3	null	null	null	-2.3094077
MBOAT4	null	null	null	-2.3094077
MFAP5	null	null	null	-2.3094077
MIR1249	null	null	null	-2.3094077
MIR1285-1	null	null	null	-2.3094077
MIR30C1	null	null	null	-2.3094077
MIR3146	null	null	null	-2.3094077
MIR3190	null	null	null	-2.3094077
MIR3677	null	null	null	-2.3094077
MIR378J	null	null	null	-2.3094077
MIR4677	null	null	null	-2.3094077
MIR4714	null	null	null	-2.3094077
MIR4766	null	null	null	-2.3094077
MIR562	null	null	null	-2.3094077
MIR579	null	null	null	-2.3094077
MIR602	null	null	null	-2.3094077
MIR609	null	null	null	-2.3094077
MIR6505	null	null	null	-2.3094077
MIR6738	null	null	null	-2.3094077
MIR6739	null	null	null	-2.3094077
MRGPRE	null	null	null	-2.3094077
MRVI1-AS1	null	null	null	-2.3094077
MTND1P8	null	null	null	-2.3094077
MTND4P14	null	null	null	-2.3094077
MTND4P24	null	null	null	-2.3094077
MUCL3	null	null	null	-2.3094077
MYBPC1	null	null	null	-2.3094077
NACAD	null	null	null	-2.3094077
NBEAP1	null	null	null	-2.3094077
NBPF17P	null	null	null	-2.3094077
NBPF21P	null	null	null	-2.3094077
NDST4	null	null	null	-2.3094077
NENFP1	null	null	null	-2.3094077
NEU2	null	null	null	-2.3094077
NEU4	null	null	null	-2.3094077
NLGN4Y-AS1	null	null	null	-2.3094077
NPIPB6	null	null	null	-2.3094077
NPM1P33	null	null	null	-2.3094077
NPM1P45	null	null	null	-2.3094077
NPPB	null	null	null	-2.3094077
OMP	null	null	null	-2.3094077
OPRK1	null	null	null	-2.3094077
OR7A5	null	null	null	-2.3094077
OR7E91P	null	null	null	-2.3094077
OSTN	null	null	null	-2.3094077
PACSIN1	null	null	null	-2.3094077
PCDHB5	null	null	null	-2.3094077
PEG3	null	null	null	-2.3094077
PES1P1	null	null	null	-2.3094077
PGA5	null	null	null	-2.3094077
PGAM4P1	null	null	null	-2.3094077
PIEZO2	null	null	null	-2.3094077
PIP5K1P1	null	null	null	-2.3094077
PLEKHH2	null	null	null	-2.3094077
POC1B-GALNT4	null	null	null	-2.3094077
POTEE	null	null	null	-2.3094077
PPIAP42	null	null	null	-2.3094077
PPIAP65	null	null	null	-2.3094077
PPP1R14D	null	null	null	-2.3094077
PRLH	null	null	null	-2.3094077
PRPS1L1	null	null	null	-2.3094077
PSG3	null	null	null	-2.3094077
PSMC1P3	null	null	null	-2.3094077
PSMC1P9	null	null	null	-2.3094077
PSTPIP1	null	null	null	-2.3094077
PTCHD4	null	null	null	-2.3094077
PTGES3L-AARSD1	null	null	null	-2.3094077
QRSL1P3	null	null	null	-2.3094077
RBP5	null	null	null	-2.3094077
RCVRN	null	null	null	-2.3094077
RFPL4A	null	null	null	-2.3094077
RGS22	null	null	null	-2.3094077
RGS7BP	null	null	null	-2.3094077
RHOT1P3	null	null	null	-2.3094077
RIMBP3C	null	null	null	-2.3094077
RN7SL128P	null	null	null	-2.3094077
RN7SL498P	null	null	null	-2.3094077
RN7SL530P	null	null	null	-2.3094077
RN7SL605P	null	null	null	-2.3094077
RN7SL615P	null	null	null	-2.3094077
RN7SL799P	null	null	null	-2.3094077
RNA5SP122	null	null	null	-2.3094077
RNA5SP128	null	null	null	-2.3094077
RNA5SP284	null	null	null	-2.3094077
RNA5SP530	null	null	null	-2.3094077
RNF133	null	null	null	-2.3094077
RNF186	null	null	null	-2.3094077
RNF43	null	null	null	-2.3094077
RNFT1-DT	null	null	null	-2.3094077
RNU1-35P	null	null	null	-2.3094077
RNU2-58P	null	null	null	-2.3094077
RNU6-1266P	null	null	null	-2.3094077
RNU6-2	null	null	null	-2.3094077
RNU6-342P	null	null	null	-2.3094077
RNU6-481P	null	null	null	-2.3094077
RNU6-564P	null	null	null	-2.3094077
RNU6-758P	null	null	null	-2.3094077
RPL12P15	null	null	null	-2.3094077
RPL12P33	null	null	null	-2.3094077
RPL12P41	null	null	null	-2.3094077
RPL21P66	null	null	null	-2.3094077
RPL23AP37	null	null	null	-2.3094077
RPL23AP86	null	null	null	-2.3094077
RPL39P18	null	null	null	-2.3094077
RPL3P1	null	null	null	-2.3094077
RPL7P46	null	null	null	-2.3094077
RPL9P18	null	null	null	-2.3094077
RPS10P28	null	null	null	-2.3094077
RPS21P1	null	null	null	-2.3094077
RPSAP47	null	null	null	-2.3094077
RSPH1	null	null	null	-2.3094077
RUBCNL	null	null	null	-2.3094077
S100A7A	null	null	null	-2.3094077
SAA2-SAA4	null	null	null	-2.3094077
SAP25	null	null	null	-2.3094077
SCAND3P1	null	null	null	-2.3094077
SCARNA21B	null	null	null	-2.3094077
SELENOP	null	null	null	-2.3094077
SEPTIN14P4	null	null	null	-2.3094077
SERPINB9P1	null	null	null	-2.3094077
SFTPC	null	null	null	-2.3094077
SHISA7	null	null	null	-2.3094077
SIGLEC12	null	null	null	-2.3094077
SLC1A1	null	null	null	-2.3094077
SLC23A1	null	null	null	-2.3094077
SLC25A30-AS1	null	null	null	-2.3094077
SLC35F1	null	null	null	-2.3094077
SLC47A2	null	null	null	-2.3094077
SLC5A10	null	null	null	-2.3094077
SLCO3A1	null	null	null	-2.3094077
SMPD5	null	null	null	-2.3094077
SNORA12	null	null	null	-2.3094077
SNRPGP9	null	null	null	-2.3094077
SNX31	null	null	null	-2.3094077
SOX1-OT	null	null	null	-2.3094077
SPATA31D1	null	null	null	-2.3094077
SPATA45	null	null	null	-2.3094077
SRRM4	null	null	null	-2.3094077
SRSF10P1	null	null	null	-2.3094077
SS18L2P1	null	null	null	-2.3094077
ST13P2	null	null	null	-2.3094077
STK33	null	null	null	-2.3094077
SUMO1P4	null	null	null	-2.3094077
SYN1	null	null	null	-2.3094077
TAGAP	null	null	null	-2.3094077
TBC1D3P6	null	null	null	-2.3094077
TCAM1P	null	null	null	-2.3094077
TDGF1P7	null	null	null	-2.3094077
TEMN3-AS1	null	null	null	-2.3094077
THEMIS	null	null	null	-2.3094077
THSD7A	null	null	null	-2.3094077
TIFAB	null	null	null	-2.3094077
TLR2	null	null	null	-2.3094077
TMEM212	null	null	null	-2.3094077
TMEM255A	null	null	null	-2.3094077
TMIGD3	null	null	null	-2.3094077
TMPRSS11A	null	null	null	-2.3094077
TMPRSS6	null	null	null	-2.3094077
TNFRSF17	null	null	null	-2.3094077
TP53I11	null	null	null	-2.3094077
TPTE2P4	null	null	null	-2.3094077
TRAV17	null	null	null	-2.3094077
TRBV12-3	null	null	null	-2.3094077
TRDN	null	null	null	-2.3094077
TRIM71	null	null	null	-2.3094077
TRIM80P	null	null	null	-2.3094077
TRPC7-AS1	null	null	null	-2.3094077
TTC6	null	null	null	-2.3094077
TUBB4A	null	null	null	-2.3094077
UBE2L5	null	null	null	-2.3094077
UBE2Q2P12	null	null	null	-2.3094077
UBL4B	null	null	null	-2.3094077
UCMA	null	null	null	-2.3094077
UNC13C	null	null	null	-2.3094077
USHBP1	null	null	null	-2.3094077
VTA1P2	null	null	null	-2.3094077
VTCN1	null	null	null	-2.3094077
WDFY4	null	null	null	-2.3094077
ZNF253	null	null	null	-2.3094077
ZNF268	null	null	null	-2.3094077
ZNF402P	null	null	null	-2.3094077
ZNF439	null	null	null	-2.3094077
ZNF570	null	null	null	-2.3094077
ZNF716	null	null	null	-2.3094077
ZNF720	null	null	null	-2.3094077
ZNF781	null	null	null	-2.3094077
ZNF788P	null	null	null	-2.3094077
ZNF808	null	null	null	-2.3094077
ZNF888	null	null	null	-2.3094077
ZNF971P	null	null	null	-2.3094077
RTL3	null	null	null	-2.307177
EMCN	null	null	null	-2.30634
ST13P18	null	null	null	-2.3038142
HNRNPA1P7	null	null	null	-2.3023307
PRDX2P1	null	null	null	-2.2977312
LPAR5	null	null	null	-2.2942367
KRT32	null	null	null	-2.2922325
H19	null	null	null	-2.290096
SPN	null	null	null	-2.2868447
ANKRD22	null	null	null	-2.2857437
MAPT-IT1	null	null	null	-2.2857437
MIR659	null	null	null	-2.2857437
C4B	null	null	null	-2.2810905
KLRC4-KLRK1	null	null	null	-2.2799299
LINC00643	null	null	null	-2.279711
TBR1	null	null	null	-2.279711
ASPRV1	null	null	null	-2.2783344
MTND6P4	null	null	null	-2.2783344
MYT1	null	null	null	-2.2783344
PRICKLE2-AS3	null	null	null	-2.2783344
PLCH2	null	null	null	-2.2755156
SERPINB3	null	null	null	-2.275298
GOLGA7B	null	null	null	-2.2742121
LINC02080	null	null	null	-2.2734907
BMPER	null	null	null	-2.2662933
SNORD100	null	null	null	-2.2643569
LCK	null	null	null	-2.2601185
LINC01359	null	null	null	-2.2597346
MYH7B	null	null	null	-2.2597346
CADM3	null	null	null	-2.2551844
CDK18	null	null	null	-2.2532933
ANKRD24	null	null	null	-2.2515147
DYSF	null	null	null	-2.2501876
C1orf54	null	null	null	-2.2494075
ANO1	null	null	null	-2.2482514
CCL7	null	null	null	-2.2482514
CCNB2P1	null	null	null	-2.2482514
CD27	null	null	null	-2.2482514
CD6	null	null	null	-2.2482514
CD8B	null	null	null	-2.2482514
DENND2D	null	null	null	-2.2482514
FASLG	null	null	null	-2.2482514
FBLN2	null	null	null	-2.2482514
FRMPD3	null	null	null	-2.2482514
IKZF1	null	null	null	-2.2482514
KRTAP21-2	null	null	null	-2.2482514
MIR4479	null	null	null	-2.2482514
MIR601	null	null	null	-2.2482514
MRPL15P1	null	null	null	-2.2482514
RNF175	null	null	null	-2.2482514
RNU1-72P	null	null	null	-2.2482514
SLAMF1	null	null	null	-2.2482514
TMEM225B	null	null	null	-2.2482514
TMTC1	null	null	null	-2.2482514
ASB5	null	null	null	-2.2478576
ATF4P3	null	null	null	-2.2478576
DCHS2	null	null	null	-2.2478576
ELAVL2	null	null	null	-2.2478576
EXTL1	null	null	null	-2.2478576
FBXO25	null	null	null	-2.2478576
LINC02542	null	null	null	-2.2478576
MOGAT2	null	null	null	-2.2478576
NLRP10	null	null	null	-2.2478576
SEMA6A	null	null	null	-2.2478576
SLC66A1L	null	null	null	-2.2478576
SLC8A2	null	null	null	-2.2478576
CLEC3B	null	null	null	-2.2463918
ELF3	null	null	null	-2.2463918
FYB1	null	null	null	-2.2463918
HRC	null	null	null	-2.2463918
LINC00304	null	null	null	-2.2463918
MXRA8	null	null	null	-2.2463918
NPM1P46	null	null	null	-2.2463918
RPSAP4	null	null	null	-2.2463918
UCHL1-AS1	null	null	null	-2.2463918
GCOM2	null	null	null	-2.242599
RPA4	null	null	null	-2.2411551
C1QTNF1	null	null	null	-2.232344
BBOX1	null	null	null	-2.229568
AQP1	null	null	null	-2.216364
LURAP1L-AS1	null	null	null	-2.209984
ATP5MF-PTCD1	null	null	null	-2.2067547
BEGAIN	null	null	null	-2.2067547
BTF3P12	null	null	null	-2.2067547
C14orf178	null	null	null	-2.2067547
CARD14	null	null	null	-2.2067547
CPN2	null	null	null	-2.2067547
DCAF13P3	null	null	null	-2.2067547
INTS6L	null	null	null	-2.2067547
KRASP1	null	null	null	-2.2067547
NRBF2P4	null	null	null	-2.2067547
PDE8B	null	null	null	-2.2067547
PPARGC1A	null	null	null	-2.2067547
PPP4R1-AS1	null	null	null	-2.2067547
SCN4A	null	null	null	-2.2067547
SOX2-OT	null	null	null	-2.2067547
TRIM9	null	null	null	-2.2067547
UPF3AP2	null	null	null	-2.2067547
WDR38	null	null	null	-2.2067547
CYSLTR2	null	null	null	-2.2066882
HM13-AS1	null	null	null	-2.2066882
LINC00686	null	null	null	-2.2066882
LUNAR1	null	null	null	-2.2066882
MEFV	null	null	null	-2.2066882
MIR93	null	null	null	-2.2066882
MMEL1	null	null	null	-2.2066882
MTMR7	null	null	null	-2.2066882
MUC13	null	null	null	-2.2066882
OMD	null	null	null	-2.2066882
RCAN2	null	null	null	-2.2066882
SNORA80B	null	null	null	-2.2066882
TDRD9	null	null	null	-2.2066882
TMEM266	null	null	null	-2.2066882
TRBV13	null	null	null	-2.2066882
TUBA8	null	null	null	-2.2066882
USP50	null	null	null	-2.2066882
VPS35P1	null	null	null	-2.2066882
WT1	null	null	null	-2.2066882
ANKRD6	null	null	null	-2.206416
ANXA3	null	null	null	-2.206416
CDH15	null	null	null	-2.206416
FBXO16	null	null	null	-2.206416
FHIT	null	null	null	-2.206416
LINC02076	null	null	null	-2.206416
PPIAP54	null	null	null	-2.206416
RNGTTP1	null	null	null	-2.206416
SMAD5-AS1	null	null	null	-2.206416
SUPT4H1P2	null	null	null	-2.206416
TMEM191B	null	null	null	-2.206416
GAPDHP60	null	null	null	-2.2051337
FAM117A	null	null	null	-2.201915
LINC00958	null	null	null	-2.1944654
LIX1-AS1	null	null	null	-2.1944654
MIR7111	null	null	null	-2.1911223
CD96	null	null	null	-2.184442
AK3P3	null	null	null	-2.183182
FER1L4	null	null	null	-2.18211
LINC00626	null	null	null	-2.1778748
DCHS1	null	null	null	-2.1726413
SPATA12	null	null	null	-2.1714296
LSAMP-AS1	null	null	null	-2.166504
OR1F1	null	null	null	-2.166504
CDC42BPG	null	null	null	-2.1661594
DUSP8	null	null	null	-2.1626189
CORO1A	null	null	null	-2.1618514
PRKCH	null	null	null	-2.159105
CASS4	null	null	null	-2.1549504
IL1RAPL1	null	null	null	-2.1502588
INSC	null	null	null	-2.143565
SEZ6L2	null	null	null	-2.1410427
DCN	null	null	null	-2.1394637
SERPINE2	null	null	null	-2.137813
MISP	null	null	null	-2.1368642
PNCK	null	null	null	-2.1361225
HCST	null	null	null	-2.1359944
LINC02178	null	null	null	-2.1331766
RANBP3L	null	null	null	-2.1331766
UPF3AP3	null	null	null	-2.1331766
CD53	null	null	null	-2.130415
CIITA	null	null	null	-2.127859
SESN2	null	null	null	-2.1258674
GNMT	null	null	null	-2.1211357
RASGRP3	null	null	null	-2.119052
CDHR4	null	null	null	-2.1149478
LGALS8-AS1	null	null	null	-2.1140287
MST1R	null	null	null	-2.1132247
PTPN6	null	null	null	-2.11194
ADAM28	null	null	null	-2.1106434
RPL7AP66	null	null	null	-2.1070955
IFI6	null	null	null	-2.1064517
CRYZL2P-SEC16B	null	null	null	-2.10638
LINC00313	null	null	null	-2.10638
C1R	null	null	null	-2.099356
PTGES3L	null	null	null	-2.0976684
HDAC2-AS2	null	null	null	-2.095782
SCN9A	null	null	null	-2.0776653
ASPN	null	null	null	-2.0763922
LYG1	null	null	null	-2.0750213
TMSB15B	null	null	null	-2.0646358
ARHGEF16	null	null	null	-2.059465
GAPDHP63	null	null	null	-2.059465
RPL10P13	null	null	null	-2.0573742
RNF7P1	null	null	null	-2.056486
SRD5A3-AS1	null	null	null	-2.056486
ITGAM	null	null	null	-2.054696
FPR3	null	null	null	-2.0524025
KCNU1	null	null	null	-2.0524025
KRT8P36	null	null	null	-2.0524025
LINC01191	null	null	null	-2.0524025
PAEP	null	null	null	-2.0520346
MRC1	null	null	null	-2.0510054
KCTD16	null	null	null	-2.0484087
OCA2	null	null	null	-2.0437489
LINC02593	null	null	null	-2.0430954
DAPK2	null	null	null	-2.0426028
JPH2	null	null	null	-2.0423985
LINC01431	null	null	null	-2.03957
KISS1	null	null	null	-2.038513
ANKDD1B	null	null	null	-2.037314
C4orf47	null	null	null	-2.0296044
GUCY1A2	null	null	null	-2.0230348
TXNIP	null	null	null	-2.021356
MYO16-AS1	null	null	null	-2.019198
LINC00239	null	null	null	-2.01903
ARHGAP4	null	null	null	-2.0181181
STON2	null	null	null	-2.0161352
EIF5P1	null	null	null	-2.0144954
C10orf91	null	null	null	-2.0067496
FOXD4L1	null	null	null	-2.0067496
BAMBI	null	null	null	-2.0023248
ESR2	null	null	null	-1.9956963
CTNNA2	null	null	null	-1.9949707
ITGA2B	null	null	null	-1.9949707
TAS2R31	null	null	null	-1.9949707
LRRC7	null	null	null	-1.9948164
LINC02330	null	null	null	-1.9930882
P2RY8	null	null	null	-1.9852511
SRD5A2	null	null	null	-1.983526
GNA14	null	null	null	-1.9830111
PTPRR	null	null	null	-1.9759128
TPPP3	null	null	null	-1.9749614
CALML6	null	null	null	-1.973943
TUB	null	null	null	-1.9683414
IFITM10	null	null	null	-1.9671618
CTAGE11P	null	null	null	-1.95913
PTPRZ1	null	null	null	-1.95913
SNORA75	null	null	null	-1.95913
NUPR1	null	null	null	-1.9580384
ADGRF5	null	null	null	-1.9570811
NEURL3	null	null	null	-1.9563482
ITGAX	null	null	null	-1.9508413
ITGA6-AS1	null	null	null	-1.950022
PCSK1	null	null	null	-1.9456453
C1QTNF6	null	null	null	-1.9446392
MYOSLID	null	null	null	-1.9425663
THBS2	null	null	null	-1.9402268
WAS	null	null	null	-1.9397705
C1QTNF12	null	null	null	-1.9374565
FEZ1	null	null	null	-1.9334699
SINHCAFP1	null	null	null	-1.9274648
FNDC11	null	null	null	-1.9268708
GALNT15	null	null	null	-1.9243084
PRLR	null	null	null	-1.9236408
CASP10	null	null	null	-1.9221807
OSBP2	null	null	null	-1.921059
C1RL	null	null	null	-1.9188194
ATF3	null	null	null	-1.9144117
TSPEAR-AS2	null	null	null	-1.9115216
HNRNPA3P13	null	null	null	-1.9099634
RNASE4	null	null	null	-1.9099634
SCAT1	null	null	null	-1.9096161
TRAF1	null	null	null	-1.9084727
OBSCN	null	null	null	-1.9063056
EIF4A2P3	null	null	null	-1.901147
TGM5	null	null	null	-1.901147
LINC01615	null	null	null	-1.8986937
KCNQ3	null	null	null	-1.8963928
DNAJC12	null	null	null	-1.895904
GRIK5	null	null	null	-1.8928396
TAS1R3	null	null	null	-1.8910459
HLA-F	null	null	null	-1.8899823
EIF2S2P2	null	null	null	-1.8891304
SNORD88A	null	null	null	-1.8891304
GAPDHP62	null	null	null	-1.88885
RAMP1	null	null	null	-1.88885
ZFHX2	null	null	null	-1.8861547
CHRM3-AS2	null	null	null	-1.8846871
HOXA-AS3	null	null	null	-1.8846871
KCNF1	null	null	null	-1.8846871
KIAA2012-AS1	null	null	null	-1.8846871
NME9	null	null	null	-1.8846871
NUTM2B	null	null	null	-1.8846871
SYNGAP1-AS1	null	null	null	-1.8846871
TNFRSF1B	null	null	null	-1.8846871
TRPC4	null	null	null	-1.8846871
CHI3L2	null	null	null	-1.8826872
CLIC2	null	null	null	-1.8819977
C20orf203	null	null	null	-1.8803755
CLEC18A	null	null	null	-1.8803755
LINC01186	null	null	null	-1.8803755
LRGUK	null	null	null	-1.8803755
MIR554	null	null	null	-1.8803755
MIR765	null	null	null	-1.8803755
MYO1G	null	null	null	-1.8803755
PABPC1P1	null	null	null	-1.8803755
RPL23AP97	null	null	null	-1.8803755
SPANXN3	null	null	null	-1.8803755
APOBR	null	null	null	-1.87943
BCAS1	null	null	null	-1.87943
CAPSL	null	null	null	-1.87943
EIPR1-IT1	null	null	null	-1.87943
ERVMER61-1	null	null	null	-1.87943
FAM86KP	null	null	null	-1.87943
HNRNPCL1	null	null	null	-1.87943
IHH	null	null	null	-1.87943
KLRD1	null	null	null	-1.87943
KRT18P37	null	null	null	-1.87943
LINC01271	null	null	null	-1.87943
SEPTIN14P8	null	null	null	-1.87943
TEKT4	null	null	null	-1.87943
TMEM239	null	null	null	-1.87943
TNNT2	null	null	null	-1.87943
ZDHHC20-IT1	null	null	null	-1.87943
ZNF467	null	null	null	-1.87943
GREB1	null	null	null	-1.8776911
TMEM63C	null	null	null	-1.872727
APOE	null	null	null	-1.8608625
PTPRH	null	null	null	-1.8589811
CABP1	null	null	null	-1.8568922
AGGF1P1	null	null	null	-1.8568195
MSLN	null	null	null	-1.8568195
CA9	null	null	null	-1.8564562
KDM7A-DT	null	null	null	-1.8564407
ARHGEF37	null	null	null	-1.8524387
MYLIP	null	null	null	-1.8521343
MIP	null	null	null	-1.8492465
HIF1A-AS3	null	null	null	-1.8448551
LINC01239	null	null	null	-1.8442144
IDI2-AS1	null	null	null	-1.8432153
ZNF460-AS1	null	null	null	-1.8420216
PKMP3	null	null	null	-1.8384598
NDNF	null	null	null	-1.8371398
UNC13D	null	null	null	-1.8368031
GPR183	null	null	null	-1.8346697
ZG16B	null	null	null	-1.8342109
LINC00862	null	null	null	-1.8317326
GIPC2	null	null	null	-1.8277237
NTRK1	null	null	null	-1.8222384
PLA2G4C	null	null	null	-1.820601
FTH1P11	null	null	null	-1.8188742
PTGS1	null	null	null	-1.8184013
RAPGEF4	null	null	null	-1.8181758
SQOR	null	null	null	-1.8143201
SVEP1	null	null	null	-1.8141339
JCHAIN	null	null	null	-1.8139819
GP6	null	null	null	-1.8116634
OAS1	null	null	null	-1.8111844
SKOR1	null	null	null	-1.8108995
EBF4	null	null	null	-1.8096477
BTG4	null	null	null	-1.8059961
FOSB	null	null	null	-1.803059
SLC17A7	null	null	null	-1.8028629
GNGT2	null	null	null	-1.7996385
CNGA4	null	null	null	-1.7992499
DAND5	null	null	null	-1.7992499
MIR23B	null	null	null	-1.7992499
PCDHGA11	null	null	null	-1.7992499
ZFP2	null	null	null	-1.7992499
MARVELD2	null	null	null	-1.7907931
CCDC113	null	null	null	-1.7889636
OAS2	null	null	null	-1.7879422
SPANXN1	null	null	null	-1.7878458
ABLIM2	null	null	null	-1.7867535
RNA5SP155	null	null	null	-1.7867535
TNFSF13B	null	null	null	-1.7831141
CASC15	null	null	null	-1.7826061
PPP1R32	null	null	null	-1.7824074
SERPINA5	null	null	null	-1.7818928
NAP1L3	null	null	null	-1.7809961
IL2RA	null	null	null	-1.7806686
NLGN3	null	null	null	-1.7806686
SIRPB1	null	null	null	-1.775995
MSH4	null	null	null	-1.7746254
SNORD101	null	null	null	-1.7739351
CLDN4	null	null	null	-1.7732626
MATN1-AS1	null	null	null	-1.7721282
MUC12	null	null	null	-1.7717017
SHISAL1	null	null	null	-1.7708267
KLHL3	null	null	null	-1.7685865
ECM2	null	null	null	-1.7657949
SNORA13	null	null	null	-1.7651043
MAOA	null	null	null	-1.7624731
BORCS8-MEF2B	null	null	null	-1.7618753
DPP4	null	null	null	-1.7612648
CNKSR1	null	null	null	-1.7607528
FILIP1	null	null	null	-1.7579257
KCNK15-AS1	null	null	null	-1.7521362
PGAM2	null	null	null	-1.7521362
MAP7D2	null	null	null	-1.7499318
FNDC5	null	null	null	-1.7494041
SLC8A1-AS1	null	null	null	-1.7466066
OASL	null	null	null	-1.7429955
HMGB1P6	null	null	null	-1.7421486
FAAH	null	null	null	-1.7415693
WDR45P1	null	null	null	-1.7372608
SERPINB2	null	null	null	-1.7297956
CD2BP2-DT	null	null	null	-1.7295357
CPNE8-AS1	null	null	null	-1.7292477
ABCD2	null	null	null	-1.7287203
ADA2	null	null	null	-1.7287203
CHRNE	null	null	null	-1.7286471
TSLP	null	null	null	-1.7272861
FOXJ1	null	null	null	-1.7271713
GATA6-AS1	null	null	null	-1.7250992
SERPINA1	null	null	null	-1.7155229
FAM167A	null	null	null	-1.7135758
ABCA9	null	null	null	-1.7127968
GLUD1P2	null	null	null	-1.7127968
ADCYAP1R1	null	null	null	-1.7112001
DIO2	null	null	null	-1.7107198
MPZ	null	null	null	-1.7106307
RASD1	null	null	null	-1.707618
FAR1-IT1	null	null	null	-1.7069294
HKDC1	null	null	null	-1.706056
FBXO15	null	null	null	-1.7005776
NMRAL2P	null	null	null	-1.6998341
FGFBP1	null	null	null	-1.6977313
KCNJ2-AS1	null	null	null	-1.6955066
TMEM145	null	null	null	-1.6944804
LNX1	null	null	null	-1.69436
LINC00504	null	null	null	-1.6937562
LURAP1L	null	null	null	-1.6919136
C2orf15	null	null	null	-1.6910847
CECR2	null	null	null	-1.6897424
PFKFB1	null	null	null	-1.687077
VWA7	null	null	null	-1.6851934
ME2P1	null	null	null	-1.6846228
NIPAL1	null	null	null	-1.6817658
LYPD3	null	null	null	-1.6778715
PPIHP1	null	null	null	-1.6771151
ENKUR	null	null	null	-1.6739724
LNCOG	null	null	null	-1.6736068
SAPCD1-AS1	null	null	null	-1.6730014
TXLNB	null	null	null	-1.6701924
FLVCR2	null	null	null	-1.6671602
ALOXE3	null	null	null	-1.6667812
PTHLH	null	null	null	-1.6620756
FAM187B	null	null	null	-1.6619172
RPS29P5	null	null	null	-1.6619172
GAPDHP40	null	null	null	-1.6604254
ARAP2	null	null	null	-1.6601679
MST1	null	null	null	-1.659011
EPS8L1	null	null	null	-1.6586678
SYNJ2BP-COX16	null	null	null	-1.6585182
NOXRED1	null	null	null	-1.6546652
GGT1	null	null	null	-1.6512837
THSD1	null	null	null	-1.6445962
ZBED2	null	null	null	-1.6445633
NECAP1P1	null	null	null	-1.6427857
C2orf72	null	null	null	-1.6404856
KCNMB2-AS1	null	null	null	-1.6404856
LINC02288	null	null	null	-1.6404856
DOCK11P1	null	null	null	-1.6378628
CHI3L1	null	null	null	-1.6358347
EEF1E1P1	null	null	null	-1.6358347
WNT10A	null	null	null	-1.634939
OVGP1	null	null	null	-1.632459
KLLN	null	null	null	-1.6305865
HIF1A-AS1	null	null	null	-1.6298531
HEATR4	null	null	null	-1.6254064
TNFRSF11B	null	null	null	-1.6227081
HMGB1P4	null	null	null	-1.6222427
LTK	null	null	null	-1.6222427
CRIP1	null	null	null	-1.6139846
SNORD19	null	null	null	-1.6139846
PSG9	null	null	null	-1.6132942
TMEM89	null	null	null	-1.6089215
PSD2	null	null	null	-1.605508
SFTA1P	null	null	null	-1.6053495
MIR210HG	null	null	null	-1.6036286
CCNI2	null	null	null	-1.6015425
GRAP2	null	null	null	-1.6015425
TEX12	null	null	null	-1.601239
ARHGAP25	null	null	null	-1.6005802
PLS3-AS1	null	null	null	-1.6005802
SNORA14B	null	null	null	-1.6005802
DEPP1	null	null	null	-1.6005076
PLCD4	null	null	null	-1.6000831
CCR1	null	null	null	-1.5985582
SLC44A3	null	null	null	-1.595409
SLC29A4	null	null	null	-1.5951009
KLF2	null	null	null	-1.5948944
HIST1H2AE	null	null	null	-1.5946237
CLDN6	null	null	null	-1.591267
PRR36	null	null	null	-1.5906857
CD177	null	null	null	-1.5902678
TIE1	null	null	null	-1.5892134
LINC00659	null	null	null	-1.588355
ATP8B4	null	null	null	-1.5883169
CYP51A1P3	null	null	null	-1.5883169
ZNF862	null	null	null	-1.5872809
PRXL2A	null	null	null	-1.5857081
UPK1A-AS1	null	null	null	-1.5845543
PACRG	null	null	null	-1.5833995
MAP4K1	null	null	null	-1.583025
DHRS2	null	null	null	-1.5828778
MEGF6	null	null	null	-1.58184
COL15A1	null	null	null	-1.5811659
RPS10P7	null	null	null	-1.5801679
SPX	null	null	null	-1.5766188
TSPAN32	null	null	null	-1.5765535
IMPDH1P10	null	null	null	-1.5763826
GK3P	null	null	null	-1.5745797
PRDM9	null	null	null	-1.5745797
ACAP1	null	null	null	-1.5716362
DGCR5	null	null	null	-1.5698411
RPL4P3	null	null	null	-1.5698411
TNNC2	null	null	null	-1.5698411
STXBP5-AS1	null	null	null	-1.5696135
ADAM11	null	null	null	-1.5672177
ARHGAP5-AS1	null	null	null	-1.5665867
LINC01778	null	null	null	-1.5656954
INKA2-AS1	null	null	null	-1.5651313
TPPP	null	null	null	-1.5635248
[truncated: 17,354 more rows]
