# Supplementary material for: Cooperative Targeting of Immunotherapy-Resistant Melanoma and Lung Cancer by an AXL-Targeting Antibody–Drug Conjugate and Immune Checkpoint Blockade
Source: Oxford University Press journal article supplement (doi:10.1158/0008-5472.can-20-0434), 2021-02-02
Supplement: 00085472can200434-sup-237005_3_supp_6856316_qn6p5h.xlsx [file 00085472can200434-sup-237005_3_supp_6856316_qn6p5h.xlsx]

## Sheet: Sheet1
hgnc_symbol	log2FoldChange
TSPAN6	0.172865
TNMD	0.817455
DPM1	0.0447273
SCYL3	0.0903319
C1orf112	-0.225524
FGR	-0.581649
CFH	-0.946179
FUCA2	-0.0658992
GCLC	0.0318673
NFYA	-0.134695
STPG1	-0.296814
NIPAL3	-0.127974
LAS1L	-0.41401
ENPP4	-0.155392
SEMA3F	-0.0801608
CFTR	-0.367345
ANKIB1	0.163595
CYP51A1	0.326035
KRIT1	0.18311
RAD52	0.119946
MYH16	-0.221175
BAD	-0.0737297
LAP3	-0.480447
CD99	0.119854
HS3ST1	-0.749198
AOC1	-1.80952
HECW1	0.0894479
MAD1L1	-0.185345
LASP1	-0.286902
SNX11	-0.089074
TMEM176A	-0.617432
M6PR	-0.169159
CYP26B1	-1.12979
ICA1	0.4703
DBNDD1	-0.46239
ALS2	-0.0253357
CASP10	0.145451
CFLAR	-0.0904991
TFPI	0.245202
NDUFAF7	0.179142
RBM5	0.220089
MTMR7	-0.373232
SLC7A2	0.261175
ARF5	-0.00779945
SARM1	-0.0205517
POLDIP2	-0.203576
PLXND1	0.572796
AK2	-0.137903
CD38	-1.55692
FKBP4	-0.290673
KDM1A	-0.0717627
RBM6	0.0141893
CAMKK1	0.0387226
RECQL	-0.163491
VPS50	0.230117
HSPB6	-0.0676
ARHGAP33	0.400991
NDUFAB1	-0.342823
PDK4	1.19138
SLC22A16	1.20315
ZMYND10	0.804916
ABCB5	1.63767
ARX	-0.416777
SLC25A13	0.0736011
ST7	-0.0359082
CDC27	-0.0174161
SLC4A1	-2.71151
CALCR	0.350981
HCCS	-0.354301
DVL2	0.0858199
PRSS22	-0.228
UPF1	-0.240935
SKAP2	0.103811
SLC25A5	-0.241251
MCUB	0.109597
POLR2J	-0.149263
DHX33	-0.1037
MEOX1	0.216895
THSD7A	-0.320153
LIG3	-0.0343566
RPAP3	-0.13152
ACSM3	-0.351238
REXO5	-0.0900562
CIAPIN1	-0.331148
SPPL2B	0.178733
FAM214B	-0.238812
COPZ2	0.187848
PRKAR2B	-0.0452451
MSL3	0.041458
CREBBP	-0.0751371
TSPOAP1	-2.85031
MPO	-1.92145
PON1	-0.348742
GCFC2	0.255213
WDR54	0.265792
CROT	0.0872895
ABCB4	-0.778318
KMT2E	0.0630021
RHBDD2	-0.149954
SOX8	-2.28242
IBTK	0.128167
ZNF195	0.0576912
MYCBP2	0.167227
FBXL3	0.176298
ITGAL	-1.22937
PDK2	-0.115541
ITGA3	-0.083675
ZFX	0.0600829
LAMP2	-0.0891943
ITGA2B	-0.486416
ASB4	0.526828
GDE1	0.266212
REX1BD	-0.0931116
CRLF1	0.850682
OSBPL7	0.254635
TMEM98	0.0950692
YBX2	-0.0117
KRT33A	-1.40323
MAP3K14	-0.289254
ABCC8	0.45679
TMEM132A	-0.335057
AP2B1	0.0117933
ZNF263	0.018
CX3CL1	-2.06726
SPATA20	0.053582
CACNA1G	-1.56114
TNFRSF12A	-0.239776
MAP3K9	-0.159219
RALA	-0.143826
BAIAP2L1	0.0530967
KDM7A	0.323218
ETV1	0.456579
AGK	0.0467676
ALDH3B1	0.503797
TTC22	0.0279836
PHTF2	0.332494
CCL26	-0.811773
FARP2	0.0838275
GGCT	-0.220531
DBF4	-0.273475
TBXA2R	-0.216009
IFRD1	-0.125261
LGALS14	0.0961158
COX10	-0.275286
GTF2IRD1	0.150617
PAF1	-0.433827
VPS41	0.451961
ARHGAP44	0.309115
ELAC2	-0.365107
SCIN	0.4772
ARSD	0.490263
PNPLA4	-0.317793
MYH13	1.17737
ADIPOR2	-0.0180012
CDKL3	-0.289131
UPP2	-0.174274
PRSS21	-1.0072
MARK4	0.165713
PROM1	-1.19865
CCDC124	-0.13123
CEACAM21	-0.616917
PAFAH1B1	0.0858883
DNAH9	-0.242755
KIAA0100	0.0189848
GAS7	-0.16443
TRAPPC6A	0.192972
MATK	-0.0250619
CD79B	-3.09699
SCN4A	-2.36765
ST7L	0.150546
TKTL1	-0.938797
PAX6	-0.109345
RPUSD1	-0.187521
RHBDF1	0.0568855
LUC7L	0.2567
BAIAP3	0.143124
TSR3	-0.136357
PIGQ	0.00108201
CRAMP1	0.0453812
TEAD3	0.201376
SELE	-1.18731
DNAJC11	-0.193276
MYLIP	0.0595356
NOX1	-1.76714
E2F2	-0.226385
PSMB1	-0.170708
SYN1	-0.00533833
JARID2	0.106873
CDKL5	0.13694
CAMK1G	-0.477564
CDK11A	-0.277258
NADK	0.0528708
TFAP2B	1.07783
DLEC1	-0.0163672
CYTH3	0.0512184
ADAM22	0.231343
SYPL1	-0.10931
CYB561	-0.106328
SPAG9	-0.0658103
CELSR3	-0.0338062
AASS	1.13054
PLEKHG6	0.124785
SS18L2	-0.143157
MPND	0.103411
MGST1	-0.054608
CRY1	-0.190899
PGLYRP1	0.817455
NFIX	-0.185885
ST3GAL1	-0.236108
MMP25	-1.23205
IL32	-1.03282
PKD1	0.0237952
MAPK8IP2	-0.632624
MED24	-0.21113
RHOBTB2	0.547126
HEATR5B	0.237991
SEC62	-0.174698
RPS20	0.125416
CSDE1	0.0936132
UBE3C	-0.00715914
REV3L	0.228539
TENM1	1.98521
MASP2	-1.96283
IYD	-0.226736
FAM76A	0.0518299
TRAF3IP3	-0.235678
POMT2	-0.0141973
VTA1	-0.059127
MLXIPL	-0.111842
BAZ1B	-0.168589
RANBP9	0.118036
ETV7	-1.83158
SPRTN	-0.363313
METTL13	-0.216566
DYRK4	-0.0569288
ZNF207	-0.170312
UQCRC1	-0.192662
STARD3NL	0.083965
CD9	-0.149186
HHATL	-2.64768
NCAPD2	-0.154782
IFFO1	-0.769397
GIPR	0.272886
PHF7	-0.0102407
SEMA3G	-1.65476
NISCH	0.330733
STAB1	-1.83586
FUZ	0.263986
SLC6A13	-0.200543
IDS	0.0983109
PRSS3	-0.489733
ZNF200	-0.140344
CD4	-1.22923
LRRC23	0.269982
BTK	-1.21066
HFE	0.421251
SCMH1	0.122972
FYN	-0.144587
HIVEP2	0.0514788
ELOA	-0.218542
LYPLA2	-0.325859
CLCN6	0.219663
MRC2	-0.0227815
NME1-NME2	-1.40347
SLC6A7	0.278322
TSPAN9	0.242498
BTBD7	0.148726
APBA3	-0.130859
MKS1	0.149664
ABHD5	-0.276687
ANOS1	-0.681913
AKAP8L	0.0190607
MBTD1	0.389949
UTP18	-0.114594
RNF216	-0.0184653
TTC19	0.176924
PTBP1	-0.22095
DPF1	-0.0241119
SYT7	-0.15475
LARS2	-0.216245
PIK3C2A	0.24998
PLAUR	-0.693943
ANLN	-0.253772
WIZ	-0.212211
RABGAP1	0.287164
DCN	-0.0192877
QPCTL	0.160914
PPP5C	-0.187278
CEP68	0.185202
MAP4K3	0.301386
ZBTB32	-3.53938
TMEM159	-0.0335541
GABRA3	0.162728
BRCA1	-0.15052
ERCC1	0.030306
CD22	-0.391582
SEMA3B	0.310866
MBTPS2	-0.0851396
PRICKLE3	-0.260636
LTF	-0.612491
EXTL3	-0.0285886
NR1H4	-0.537384
ELOVL5	-0.110984
ALOX5	0.244821
CALCOCO1	0.439286
UBR7	0.00568841
MAP4K5	0.14625
PSMC4	-0.454475
MAN2B2	0.141069
CLDN11	-1.16716
SLC25A39	-0.255516
MVP	-0.187821
NUB1	-0.14271
PGM3	-0.150459
RWDD2A	0.284704
CLK1	0.536042
POLR3B	-0.0859742
ANGEL1	0.0354831
RNF14	-0.0663303
DNASE1L1	0.138684
DDX11	-0.173692
HEBP1	0.114717
GPRC5A	0.0693493
MAMLD1	0.00103634
CD6	-1.48929
TACC3	-0.364338
UFL1	0.0636783
POLA2	-0.148179
ZC3H3	-0.195328
CAPN1	-0.0464279
ACPP	0.677938
MDH1	-0.0857376
SLC30A9	0.321216
MTMR11	-0.0680096
COX15	-0.053939
CCDC88C	-0.0065345
YAF2	0.194653
ZMYND11	0.100617
WAS	-0.0706637
DPEP1	-2.16706
BID	-0.0863572
MATR3	0.26376
NPC1L1	-1.74062
XYLT2	0.127727
RGPD5	0.35857
STMN4	-0.692815
NUDCD3	-0.0234378
CHDH	0.216863
IL20RA	-0.328635
GLT8D1	0.26661
ATP2C1	-0.0348505
SLC38A5	-0.031209
RALBP1	0.0878731
RUFY3	0.35099
CNTN1	1.20545
SLC11A1	0.332909
WWTR1	-0.00553341
AGPS	-0.0165856
CXorf56	0.108809
ATP1A2	-0.117376
TTC27	-0.142602
ZNF582	-0.0384298
VSIG2	-0.431968
PHLDB1	0.106359
MARCO	-1.66545
CYP24A1	0.3085
PRDM11	0.152813
SYT13	-0.493177
SNAI2	-0.343721
CD74	-0.744194
HGF	1.25776
ZRANB1	0.177276
NCDN	-0.227156
ADGRA2	0.0655988
CCT8L1P	-0.317681
ZFP64	-0.0106058
MNAT1	0.0754507
SAMD4A	0.0350311
RUNX3	-0.667729
MRE11	0.123087
PLEKHB1	-0.0772686
SERPINB1	-0.289053
CYP3A43	2.32904
SLC7A9	-0.153652
SPAST	0.0993875
NRXN3	-2.1597
OSBPL5	0.106196
AQR	-0.0478828
CPS1	-0.771015
C8B	0.740063
FHL1	-0.257181
RTF2	-0.172806
GABRA1	0.818934
NLRP2	0.573982
SLC45A4	0.197871
RNF10	0.110765
ZNF839	0.0865505
ZDHHC6	0.0834265
GRAMD1B	0.127339
RNH1	-0.192318
NDUFS1	0.0373252
RB1CC1	0.32731
ERP44	-0.0319313
ALAS1	-0.48995
BIRC3	-0.46156
AKAP11	0.208348
GLRX2	-0.484771
SNAPC1	0.0774973
DERA	0.200927
STRAP	-0.310303
ABCC2	0.121343
DEF6	-0.00330317
PLEKHO1	0.146233
GCLM	0.231132
UBR2	0.143112
EHD2	0.152837
DEPDC1	-0.146974
CCDC28A	0.368476
RRAGD	0.144442
HSF2	0.042922
PHF20	0.0174659
HSD17B6	-1.01782
NR1H3	0.255142
TYMP	-0.36294
NCAPH2	-0.0392686
TOMM34	-0.326667
SEC63	-0.0320024
KPNA6	-0.0690172
VIM	-0.0668002
RTEL1-TNFRSF6B	0.305171
FAS	-0.401566
RNASET2	1.01245
CD44	-0.0694348
KCNG1	-0.233272
AGPAT4	0.328583
SLAMF7	-2.58314
BTN3A1	-0.121417
MIPEP	-0.0604423
PRKCH	0.104123
INSRR	-1.97699
IFNGR1	-0.0801759
B4GALT7	-0.14703
SH2D2A	-0.369297
VRK2	0.167922
TNFRSF1B	-0.900275
VEZT	0.0114698
POU2F2	-0.898601
BRD9	-0.0980637
SNX1	0.183372
TBPL1	-0.111124
ARNTL2	-0.131752
BCLAF1	-0.031287
SLC39A9	0.0684809
ANK1	-0.306981
TFB1M	-0.227567
RABEP1	0.0723168
HMGB3	-0.0299143
NUP160	-0.0440658
BAK1	-0.40232
MUSK	-0.981117
IKZF2	0.684754
GRN	-0.190834
FAM13B	0.357406
ARHGAP31	-0.550263
CENPQ	-0.487863
SARS	-0.179476
RANBP3	-0.0893746
ARID4A	0.391702
EIPR1	-0.150255
PNPLA6	-0.00201614
IFT88	0.432795
ALG1	-0.320043
ZCCHC8	0.110534
ABCF2	-0.317123
CHPF2	-0.0910034
LRRC7	0.462222
FUT8	0.17126
UBA6	0.0677568
GAB2	-0.332538
ATP6V0A1	-0.0293981
PIAS1	0.219778
SLC4A7	-0.150994
APBA2	-0.324944
MAP2K3	-0.454196
EFCAB1	0.441261
TMSB10	-0.219235
ASTE1	-0.171966
RNF19A	0.230193
PEX3	0.0238398
GABARAPL2	0.152355
MYOC	1.3467
SH3YL1	0.358137
FAM136A	-0.0419396
VCL	-0.122955
DEPDC1B	-0.0388965
DAPK2	0.94008
NSMAF	0.12944
ADSS	0.138684
TIMP2	0.017834
RFC1	0.0343501
TBC1D23	0.13943
CUL3	0.0691411
MYOM2	-0.428009
CYP46A1	-0.931181
	0.138063
SLC18A1	1.23725
USP2	-0.423655
CASR	-0.985889
TUBG2	0.24506
RPL26L1	-0.452311
FLT4	-0.177689
NSUN2	-0.189855
FBXO42	0.145672
MFAP3	-0.202678
MRI1	0.323803
METTL1	-0.477912
HOXC8	-0.366804
AGA	-0.0668212
PI4K2B	0.448812
BOD1L1	0.0183249
MAT2B	-0.0748673
TLL1	-0.142168
EDC4	-0.162004
TRIO	-0.0722789
VCAN	0.268379
CLEC16A	0.0415339
MSR1	1.16137
CDH1	-0.342788
MTREX	0.0393844
DNAH5	-0.0596077
ZFYVE16	0.381075
RIPOR1	-0.327117
RAI14	0.00860716
SOX30	-0.457749
PNKP	-0.00157736
BEST2	-0.520682
PHLPP2	-0.0959821
SPDL1	-0.253526
STAU2	0.166642
PQLC2	-0.219119
CTNS	-0.340628
RTN4R	-0.19787
PHF23	-0.277551
CDH10	0.0961175
INPP4A	0.0871073
RAB27B	0.220978
PSMA4	-0.278535
MYO16	0.435192
LSG1	-0.21212
PARP3	0.0752169
TNC	-0.120345
THAP3	-0.320567
RIPOR3	0.470428
TDP1	-0.0160592
AIFM2	-0.210678
SPATA7	0.450908
MED17	-0.00217857
RETSAT	-0.255719
CAPG	-0.110123
AP2S1	-0.244083
USH2A	0.179954
TG	-1.42838
ADAM28	-0.0381518
BARX2	0.000167358
DCUN1D1	0.150982
JADE2	-0.138207
ZIC2	0.23652
LCP2	-0.511562
TRIT1	0.0246128
GUCA2B	-0.634073
CUL7	0.182438
CTNNA1	-0.0129449
PHKA2	0.543352
CNTLN	0.163797
HSPA5	-0.347431
DSG2	-0.16327
GEMIN8	0.0516938
OFD1	0.259077
GPM6B	2.01056
MAGEC2	-0.930589
PREX2	1.52292
WDR37	0.0939159
YTHDC2	0.250145
CTPS2	0.263766
ATP6V1H	-0.108211
POLR2B	0.0148503
FAM214A	0.499709
ARAP2	0.535635
TPR	0.0930366
CP	0.940251
KIAA0556	0.218825
DTNBP1	-0.0698883
XK	-0.0698209
ANO2	0.0626635
C12orf4	-0.0555464
SCML1	0.038964
WWC3	0.199434
ARHGAP6	1.65227
FAM184B	-1.0542
MAP4	-0.126411
GOPC	0.0979557
ROS1	-0.137905
USP28	0.207555
HDAC9	-1.31604
TSPAN17	-0.0733302
NOP16	-0.552195
CC2D2A	0.0687406
RRM2B	0.201239
ZNF800	-0.0171948
TNFRSF17	0.84301
SNX29	0.102199
LMO3	0.895773
MRPS10	-0.146974
GUCA1A	-0.198347
RSF1	0.106356
VPS13D	0.213229
CELF2	0.315644
FAM120A	0.0334714
R3HDM1	-0.0450328
COL9A2	-0.506969
KITLG	0.214173
ERCC8	0.318113
ADAMTS6	-0.246791
H6PD	0.195614
VAMP3	0.0138873
PER3	0.124941
UTS2	-1.20351
TNFRSF9	-2.03632
EPN3	0.102257
LTBP1	-0.234542
RCN1	-0.179158
ELN	-1.24007
RFC2	-0.25821
ARID1B	-0.0380426
CLPTM1L	-0.168329
NEDD4L	-0.498636
FOXP3	-1.03509
PPP1R3F	-0.00672612
HEXB	0.129141
PTCD2	-0.0185371
NEXMIF	-0.000280467
JKAMP	0.19747
DKK3	0.269469
ARHGEF5	0.10666
NFE2L3	-0.580489
MCUR1	0.197189
LIMA1	-0.14893
LETMD1	0.364333
SLC4A8	-0.236522
LAMC3	0.220981
PTGER3	-0.169582
TNIP3	-1.01058
MAPK9	0.191121
COL23A1	-0.641805
BCAR1	-0.12168
FAM160A2	0.0464388
HERPUD1	-0.233459
HOMER3	-0.197424
RAD51	-0.461778
POLQ	-0.162718
PIK3CB	0.262939
CYBA	-0.0927501
THOC3	-0.18349
HEBP2	0.290796
MPHOSPH9	0.14481
PLEKHA5	0.227322
PRSS8	0.100098
SIKE1	0.19382
RRP12	-0.609418
FNIP2	-0.224393
MSMO1	0.536981
TTC17	0.170865
ALX4	1.05792
FSTL4	0.0155991
FOXN3	0.212632
METTL24	-0.6442
AKR7A2	0.160562
MRTO4	-0.392681
NNAT	1.21227
USE1	-0.300628
MCF2L2	-0.340314
NRIP2	-1.71968
LAMA3	-0.241599
AP5M1	0.140092
ANAPC4	0.469725
KCNQ1	0.0294273
TRAPPC3	-0.0728608
THRAP3	-0.147451
PHPT1	-0.0949489
ENTPD2	0.210245
LY75	0.366859
ARID4B	0.152808
OPN3	0.202897
SDCCAG8	0.107657
PTPRN	0.0962132
HHAT	0.0118993
KIF1B	0.00986842
FOXC1	-0.00891701
TBC1D22A	0.226401
SYNE2	0.40158
PLEKHH1	0.225159
ATP9A	-0.0421954
CHRDL2	0.265827
FAM168A	0.323575
RELT	-0.178685
GALC	0.0164656
NOP58	-0.176762
SZRD1	-0.146082
KCNH2	-3.02672
CUL1	-0.0848459
FAM114A2	0.143967
CYFIP2	0.145302
TAB2	-0.0608608
GINM1	0.0917641
EIF2AK2	-0.0133121
USP36	-0.25584
KMT2C	0.16851
MCOLN3	0.446971
CCDC85A	0.853537
PUM2	0.2376
MRPL43	-0.0470105
ITIH4	0.130746
ITIH1	0.113589
HPF1	-0.018934
ZFR	-0.156405
ZNF280C	-0.0143544
NPFFR2	-1.0072
PHF21B	0.445749
TRAF1	-0.713628
RC3H2	0.0987024
IL17RB	0.161262
TRAF3IP2	-0.0792464
GYG2	0.580832
DCBLD2	0.126267
SERPINB3	0.38062
SOAT1	-0.129512
PKP2	-0.0504303
MSH4	-1.01285
F7	-4.21538
GDI2	-0.0250098
PRDM1	-0.0226753
ATG5	0.167035
TMCC3	-0.0963212
PITHD1	-0.0494182
MTA3	0.22266
USP13	0.266981
ATP11B	0.273643
LAMC2	-0.643841
CDK14	0.290261
SEC61A1	-0.21529
PPP1R12A	0.0218983
RASGRF1	-0.0413486
CAMK2B	-0.723958
CROCC	0.337066
POLR3E	-0.110245
ATP2B4	0.152825
ZC3H11A	0.082488
RIOK2	-0.28517
YIPF1	-0.0158851
NDC1	-0.105061
DGKG	-0.871965
FLYWCH1	0.11659
UNKL	0.105566
TBXAS1	0.345285
PARP12	-0.337192
ALDH18A1	-0.0650082
TARBP1	0.613668
GATB	0.0471391
MXD1	-0.128711
CDK17	0.164719
DNAJC25	-0.137711
SLC2A3	-0.104618
PSD	0.0500979
CTDP1	-0.0536912
YBX3	-0.0582741
STYK1	-0.0889519
WNK1	0.0429152
CCAR1	-0.0100257
OGFR	-0.29853
GNA15	-0.0655331
CREB3L3	-0.14641
PIGV	-0.0218798
PTPRU	0.303669
SNRNP40	-0.264482
RIMBP2	0.0961175
COL11A1	0.162778
QSER1	0.0563906
MPC1	-0.0116102
ACAA1	0.0455441
BCAT1	-0.404114
HDAC7	0.241704
LZTS1	-1.12785
PRDM6	0.217116
WNT8A	-0.263645
SPAG4	0.753559
NCKAP1	0.24647
MRPS35	-0.109904
GUCY1B1	0.272121
SFSWAP	0.0995723
TNK2	0.227964
MON2	0.312894
CDH3	-0.731991
GPBP1	0.0331359
DGAT2	-0.535435
ZNF112	0.11338
CS	-0.210079
LTK	-1.82177
MRPS24	-0.486306
ELMO2	-0.218854
WAPL	-0.0488348
VMP1	0.45534
APPBP2	0.278024
POLD1	-0.0545133
SEZ6	-1.95575
EIF4B	0.248962
SLC6A16	0.0592417
BICRA	0.15235
SPHK2	-0.236325
RPL18	-0.0167124
CA11	-0.988786
ISOC2	-0.168597
U2AF2	-0.280506
EPN1	-0.00821192
MED29	-0.0996904
AHRR	-0.665262
GSC2	0.0961158
ZNF275	-0.041623
MTMR1	0.131171
GPC1	0.180732
ADCK1	-0.336823
HAGH	0.0865255
RNF4	-0.232854
CASP8	-0.111947
LIMCH1	-0.169144
INTS13	-0.0290789
TM7SF3	-0.0764281
DLX3	-0.798551
SPA17	0.0780461
TSPAN32	-0.0828819
WISP2	0.579972
ST3GAL6	0.162061
ATP2C2	0.214404
NGFR	-2.29259
CDON	0.085111
TAF2	0.115882
HIPK2	0.302335
TNPO3	-0.122016
BORCS8-MEF2B	-0.0795468
RFXANK	-0.118148
TMEM161A	-0.165458
LPAR2	-0.191225
CTSA	-0.0876953
SUGP2	0.200163
SLC12A2	0.254517
SNX24	0.0713509
EYA2	1.20265
CNN2	0.332824
ABCA7	0.446621
SNCAIP	-0.496824
DDX20	-0.302166
BTBD1	0.221518
FAR2	-0.24012
BCAS1	0.165103
CHI3L2	0.0710187
SBNO2	0.0504661
PMS1	0.133181
HMG20B	0.282674
CALCRL	-0.0132457
TAF11	0.106686
ANKS1A	-0.0856354
AP3D1	-0.16462
ZNF76	-0.0230744
SLC9A3R2	0.0898572
NTHL1	-0.0323633
UHRF1BP1	-0.108616
GNAI3	0.0316632
IPO5	0.0765316
OAT	0.0510019
WDR3	-0.321252
PKN2	0.197538
WDR18	-0.292107
TRAM2	-0.0497002
NTN1	-0.591267
GLP2R	-0.078286
MCM10	-0.397922
DGKA	0.220049
ERBB3	0.356915
ROPN1	-0.56373
ANKRD44	0.0421237
KARS	-0.187638
ADAT1	-0.117847
PDIA5	0.0203017
TBC1D22B	-0.154818
NDUFB4	-0.364595
SPEN	-0.09873
MYLK	-0.0273918
ZC3H15	-0.229579
MAP2K4	0.153334
TMEM206	-0.435523
SNAP91	0.12075
SLK	0.167687
CYB5R4	0.156178
COL17A1	-0.442842
GSTO2	0.0317929
SEC61A2	-0.150809
PRKCQ	1.3197
TLE2	0.412282
ASB1	0.109481
FAM107B	0.58348
ME1	-0.101318
TBC1D1	-0.0262014
CDK13	0.169392
MTHFD2	-0.108581
SLC9A7	0.169826
FOXJ2	0.0737312
YBX1	-0.347889
PDE4A	0.150853
PPP2R5A	0.294859
CTNNA2	0.784217
ELAVL1	-0.0503099
TIE1	-0.226845
DIP2B	0.00940507
SMARCD1	-0.137506
KDM4A	0.0219425
NFYC	-0.268815
ZMYND12	0.102555
SLC9A3	-1.62945
NGEF	-0.246114
ASPM	-0.00121013
CD84	0.0961175
ELOVL1	-0.275967
SPI1	-0.463375
ZNRD1	-0.437066
ZBTB11	-0.0380492
ATXN3	0.5197
GOLGA5	-0.0307019
FGFR2	0.0673879
LRRC40	-0.0495428
ISOC1	-0.0887548
EML1	-0.0659896
TRMT11	0.126557
THUMPD1	0.101771
MSANTD3	-0.0390044
KIF26A	0.341674
ATG2B	0.246718
ARFGEF1	0.314471
ACSM2B	-0.6442
ZFAT	0.0505442
MTFR1	0.0084188
STAG3	0.122962
FECH	0.162649
MYO9A	0.339275
PFKP	0.251979
IDI1	0.289015
SP100	-0.259452
KLF6	-0.593161
PLPP1	-0.279423
NEO1	0.146542
TRAM1	-0.00350455
PHKA1	0.202071
TNFRSF1A	-0.0548617
CACNB1	-0.25969
EVI5	0.123092
STOML1	-0.551627
PKM	-0.0839084
DHX29	0.1588
DNTTIP2	-0.299025
METTL22	0.164308
TP53BP1	0.11167
TRO	-1.58016
RRP15	-0.281706
RHOA	-0.155863
DHX8	-0.0774097
PMS2P4	-0.217931
PRKCZ	0.250204
ZFY	-0.0829494
IARS2	0.150484
SYT1	-0.0680824
NAV3	-0.718305
IDH3G	-0.241339
ROGDI	0.16243
PDZD4	-2.36908
ATP2B3	-1.99206
ROCK1	0.166622
CBFB	-0.0502425
PDK3	0.603519
HYAL2	-0.237219
HDAC4	0.172925
RASSF1	-0.377805
FGFR3	-0.0961392
IFI35	-0.874246
HEATR6	0.0502171
COASY	-0.191485
PLEKHH3	0.361895
MEF2A	0.246926
OTUD5	0.0366127
TFE3	-0.142754
TBC1D25	-0.00487386
ACSL4	-0.0378318
INPP5A	0.116668
GPKOW	-0.214772
GRIPAP1	0.035716
FTSJ1	-0.0286045
PRR11	-0.205215
REEP1	0.889432
ATP11A	0.036753
POLR1A	-0.192536
LAPTM4A	-0.136407
TTC7A	-0.107027
IP6K2	0.121883
STON1-GTF2A1L	-0.6442
SRBD1	0.139583
KIF2A	0.151552
RASGRP2	-2.54788
PSME4	0.0444663
IFT80	0.407781
SIRT2	0.0817234
ERLEC1	0.145962
PPP2R5B	-0.307141
PYGM	-1.20027
PAGE1	-0.0221259
PITX1	-0.10066
TRPC7	-1.8047
MAST4	-0.199822
ADGRF5	-1.89592
SDK2	0.156067
NUP133	0.114915
NUCKS1	0.151181
VPS35	0.00773811
DNAJA2	-0.179744
BCL3	-0.32751
KCNAB2	-0.137896
ABCC9	-2.82246
GAL	-0.934536
CLEC2D	0.655594
FUNDC1	0.0883448
MAOB	0.511355
RORA	0.583084
DRD4	0.181937
TGFBR3	-0.429078
NA	0.262207
PLA2G10	0.793183
HES2	-0.0283903
ATP1B3	-0.118329
NEDD4	0.232905
PIGB	0.173455
MAPK6	0.0737098
GNB5	0.0361512
RAB27A	-0.00104153
HDHD5	-0.0109691
UFD1	-0.266392
LRP6	0.119825
GUCY2C	-1.42295
SCT	0.798299
PHRF1	-0.0620618
ELP1	0.136901
NUCB2	-0.177
PFN2	-0.0368767
PTPN3	0.199248
SPTB	-0.236565
DAPP1	-0.40618
SLC44A1	0.416427
TMEM260	0.413814
SMG6	0.0920992
EXOC5	0.158644
CLTCL1	0.40313
FGF22	0.573004
FSTL3	-0.0660134
DGCR2	-0.0265371
RNF126	0.00421254
MNT	0.165805
ZXDC	0.0636093
JMJD6	-0.311662
POLB	0.123185
ST6GALNAC1	-0.0356787
WIPI1	0.0521079
FRMPD1	-0.956927
GBA2	0.150998
NDST1	0.0319843
ASNS	-0.310991
AP3M2	0.0189759
CNGB1	-0.682864
ST6GALNAC2	0.488985
CHAT	-0.62898
PABPC1	0.0739818
TESK2	0.295435
CFAP20	-0.429978
CSNK2A2	0.119037
PTPN21	0.168268
EIF2B3	-0.197932
CAMK2A	-0.0556954
TCOF1	-0.447679
CDC42	-0.0400827
OSBPL3	0.0267047
EPHA8	-4.18242
SLC12A3	-1.48864
RAD18	-0.225635
ATP2B1	0.155899
TRPM5	0.0138151
NCK2	0.171772
MAP4K4	-0.182412
MGAT4A	0.269103
RPL31	0.23472
WDR1	-0.118894
SNX13	0.3978
ARHGAP10	-0.0703068
RPS6KA2	0.570901
ING3	-0.0087772
VASH1	-0.0283896
LMCD1	-0.491503
BUD23	-0.168296
SEL1L	0.073241
TRIP13	-0.243573
ATP6AP1	-0.126073
TCF3	0.0186329
TRIB2	-1.3616
DAZAP1	0.00598792
MBD3	0.0683895
PRLH	-2.50115
HLTF	0.274716
FAM50A	-0.254564
FAM3A	0.0372612
CPSF1	0.0642012
MYO3B	0.32415
CYBRD1	0.369413
CDH19	0.350524
PDCD2	0.145442
SLC6A15	-0.000462708
RDH11	0.0121832
PRKACA	-0.0548091
ADGRL1	-0.200386
ACTN1	-0.232006
ZFYVE26	-0.0130244
RPS6KA6	0.0961175
EPN2	0.131198
PTPN18	0.0887284
LIMS2	-1.20767
ASIC4	-0.660678
SPEG	0.578235
LNX1	0.598602
ALDH3A2	0.42923
TFRC	-0.413477
SREBF1	0.123323
AFF4	0.0280562
UBE2D1	0.338726
MPP5	0.111008
RHOBTB1	0.108824
SMC1A	-0.208953
HSD17B10	-0.442301
MARK2	-0.110843
HMMR	-0.191498
CHFR	-0.0816503
TRHDE	-0.370228
P4HA2	-0.349674
FCGR2B	0.0961175
NFATC3	-0.0371982
TRNT1	-0.0484432
ACADVL	-0.193071
STK10	-0.198837
FBXW11	0.132815
ACAP1	0.0138159
CRMP1	0.257308
EVC	-0.00108986
DERL2	-0.0149441
SIDT1	0.0961175
NDE1	-0.115046
MRVI1	-0.0847514
TMEM38A	0.00222811
AP1M1	-0.207853
PVR	-0.334845
XRCC1	-0.130125
SCARB1	0.319939
CYP2W1	-0.863786
MCM2	-0.36768
MOV10L1	0.201831
PANX2	0.106789
SELENOO	-0.0244052
TP63	-0.215677
ALPK1	0.215111
LLGL2	0.174346
PDE8A	0.274333
CLCN4	0.00106588
NLE1	-0.174569
SDHA	-0.103292
SMARCE1	0.084987
GSDMB	-0.02361
KDM5A	0.191093
ADAM11	0.121227
PPP2R3A	0.221645
FERMT2	0.044832
ABCB11	-0.215233
DHRS9	0.325142
PTGS2	-0.178787
IGF2BP2	0.195773
MAP3K13	-0.290882
ST6GAL1	-1.588
TBX21	-0.417693
VDAC1P1	-0.437271
FRY	0.211435
PICALM	0.121015
NSF	0.003067
GLI2	-0.171626
CLASP1	0.0291216
MRPS34	-0.234694
NOTCH3	0.679736
CLNS1A	0.244126
PPP2R2C	-0.616189
TEAD2	-0.0560204
EED	-0.0598936
CDHR2	-1.36394
SNCB	-1.69104
TSG101	-0.151802
NCBP3	0.245329
ATP2A3	0.150119
CA12	0.5101
MGLL	-0.2651
NTN4	0.0666374
BCS1L	-0.251261
NUAK1	0.0235554
DPP8	0.293
SLC24A1	0.09138
ZNF532	0.117466
SCARF1	0.306329
LMAN1	0.138341
HACD3	-0.0154503
IPCEF1	0.310534
ZZEF1	0.0490361
NOX3	0.818934
ENO1	-0.204658
SLC12A1	1.54149
MYDGF	-0.165541
ANO8	0.445836
TUBE1	0.383562
ARHGEF10L	0.00454493
TXK	-0.0243636
WSCD2	-0.26455
KCNQ2	-0.68393
TACR2	0.000764294
ACTR6	0.126938
TIPIN	-0.264985
SRI	0.277447
EIF4G3	0.160705
NUP37	-0.196943
SEMA3A	-0.271722
GTSE1	-0.236473
SEMA3C	0.0299863
TTC38	-0.0360566
ACAT1	-0.104521
GRAMD4	0.221828
CELSR1	0.308758
WNT8B	-0.616917
ZNF638	0.189481
SLC25A40	0.150879
TIMM21	-0.293335
ADD2	0.440379
RASAL2	0.177366
VPS9D1	0.372184
ZNF37A	0.0019201
MARK3	0.165386
SLC25A3	0.0110368
FNDC3B	-0.115238
FOSL2	0.0902527
CACNG4	0.628232
FRYL	0.0638072
TMEM131	0.0399028
FSCN1	-0.220978
ACTB	-0.245837
MOCOS	0.130065
PLD1	0.282481
ATP12A	0.771267
WDR62	-0.362192
DLG1	0.182064
RAB7A	-0.257491
BCAP29	0.0130921
SEC31B	0.602434
SART3	-0.248754
ARHGAP15	-0.771343
TUBA3D	0.746872
PAX2	0.45679
EXOSC7	-0.158636
KIFAP3	0.00317798
MKRN2	-0.0350577
MCM6	-0.0101785
REXO2	-0.162574
RBM7	-0.0640629
RBMS2	0.10281
BAZ2A	0.00443101
PTPN23	-0.2476
MLH1	-0.0362734
UNG	-0.133863
FMO4	0.0256533
KLHL20	-0.0430715
RGS11	0.317129
SLC46A1	-0.0928992
PLXNA2	-0.844507
SPAG5	-0.315156
ANKRD13A	0.10119
TPD52	0.100438
ACACB	0.486113
TRAF4	-0.0491992
PAG1	0.502425
GPATCH1	-0.108103
ICAM3	-0.473635
NT5C2	-0.0940803
MCAM	-0.370319
GPC4	-1.41837
MBNL3	0.288628
CAMSAP3	0.0102056
RAP1GAP	-0.231341
XAB2	-0.250336
ARHGEF1	0.0450741
STXBP2	0.0525869
MAP2K7	-0.0272502
NMRK2	-0.797478
DGKD	-0.0660033
CTTNBP2	1.95118
ACTL6B	-2.91406
TOP2B	0.302419
TM9SF3	0.247702
NFKB2	-0.438026
UBE2T	-0.433388
PPP1R12B	0.192495
DNAJC10	0.0738532
GTF3C1	-0.0588023
IL4R	-0.0803495
USP33	0.324184
PAK3	-2.51691
CAPN6	0.0975964
DCX	0.0961175
SNRPA	-0.361645
SPAG6	-2.30559
EXOSC5	-0.351928
DYNC1I2	-0.20038
APBB1IP	-0.175978
LRCH4	0.108851
FAM76B	0.277132
SIRT6	-0.157044
POLD3	-0.114751
ACTN2	-0.2092
CAPZB	-0.0867699
GPR137B	1.69795
NAALAD2	0.0961175
JADE1	0.132547
SLC25A43	0.0606206
UBE2A	-0.113193
FGFR1	-0.173848
FKBP6	1.42819
SMC1B	0.104219
FBLN1	0.242212
CST7	-1.35107
MAP2	-0.756504
PIAS2	0.304812
AMPH	-0.489691
ARAF	-0.123832
MCCC1	0.217562
LAMP3	-1.53487
FAP	0.129652
NEBL	0.547296
ACER3	0.151205
UBE2K	0.0312827
PIK3C3	0.335397
N4BP2	0.396186
TIGAR	-0.090299
TULP3	-0.0712826
SYNJ2	-0.152949
ADCY2	1.18156
PPP2R5C	0.153696
PMS2P1	-0.0085407
RBFOX1	1.43746
GNB1	-0.142913
EDN1	-1.13488
MLLT10	0.19925
ZCWPW1	-0.115655
ADCYAP1R1	-1.9557
P2RY10	-0.634073
ITM2A	1.27567
NRDC	0.100477
VDAC3	-0.0289672
PCM1	0.294951
TNRC6C	0.113158
CBFA2T2	0.178692
BRINP1	-1.59367e-05
ITCH	0.0987612
PKD2L2	-0.616248
TP53INP2	-0.0551376
SDF4	-0.0343499
MYH7B	0.0672459
BPIFB2	0.415616
TP73	-0.557046
TOLLIP	-0.186281
UBE2D4	-0.0937186
CLUL1	1.60981
RUNX1T1	1.05125
CDH17	-0.217124
THOC1	0.213164
FKBP7	0.250231
OSBPL6	-1.07279
SLC1A3	0.00388129
XRCC5	-0.0572226
LXN	0.128243
SP140	-0.361267
MKNK1	0.0967819
TNS1	-0.162033
REXO1	-0.141689
SAR1A	-0.152526
CDC14A	-0.0303286
RAPGEF3	-0.0749795
CEACAM1	-1.09507
SENP1	-0.00221796
DUSP13	-0.722676
CIC	0.0441313
LIPE	0.120924
FDFT1	0.41743
PAFAH1B3	-0.214635
OPHN1	-2.10085e-05
KIF22	-0.127059
SCGN	0.816406
CARMIL1	0.156574
PGM1	0.195267
DDX1	-0.144322
DNM2	0.0565927
EPB41L2	-0.785578
RIMS1	0.958214
MOXD1	0.620162
STX7	0.169119
RABL2B	0.129982
KEAP1	-0.19531
DDX43	0.23626
PTPRH	0.0912773
DCT	-0.756532
SLC35C2	0.100123
CRYBG3	0.292002
EPHA6	0.250651
RFX3	0.368092
RIF1	0.151567
RAB21	0.0333356
SLC4A4	0.193056
SMARCA2	-0.0274672
RDH8	-0.113767
SESN1	0.513537
MID2	-0.0726726
COL5A3	-0.0875907
SRCAP	-0.104128
PUM3	-0.284813
CHRNA3	1.62603
KCNN2	-0.53479
CNOT4	-0.291722
PSEN1	0.0884244
CPOX	0.358247
CLDND1	-0.0256055
MOK	0.122373
HSP90AA1	-0.294597
RBL1	-0.0478681
DLGAP4	-0.33883
IGSF9B	-1.61821
CROCCP3	0.560632
NDC80	-0.317252
AP4E1	0.0408245
RSBN1	0.208369
MAGI3	0.0774937
CXCL2	-0.68063
AFP	-0.698279
COL4A4	0.665983
TCF7	0.147131
OSTM1	0.0287284
CDH7	2.0047
IMPG2	-0.501317
PCNP	0.107683
EXD2	-0.0810656
ARG2	-0.553245
MEF2C	-0.285509
PTPRC	-1.77097
CACNA1S	-0.981615
PKP1	-0.875059
UBA5	0.251626
STK17B	0.176556
CDC14B	0.416932
ZNF510	0.121192
LRP2	0.529066
ZNF506	0.289597
JMJD4	-0.26102
DUSP12	-0.177242
AACS	-0.0282474
DELE1	0.19665
SLC13A1	-0.625222
CADPS2	-0.179739
PCDHB4	0.245292
PCDHA6	-0.747132
PCDHGA2	0.0437625
HSPB11	-0.0325706
PHLPP1	0.164408
ATP8B1	0.0280939
IL12RB2	0.0973927
SMARCD3	-0.00494046
WDR70	-0.0124499
FYB1	-0.493835
MPP4	-0.880489
STRADB	0.318675
BZW1	0.254206
PGR	0.45603
C1QTNF3	0.848626
ME2	-0.124819
C5orf22	0.0057521
CCNT2	0.00989301
FAM135A	0.276947
COL19A1	0.35504
EPB41L3	-0.688402
COBLL1	0.138926
DLG3	0.0341349
KCNK2	-1.08189
SERTAD4	0.0167816
TRAF5	0.309162
MRPL22	-0.142919
GEMIN5	-0.292406
NFE2L1	-0.162237
SEMA5B	0.967528
GSK3B	0.084938
ITGB5	0.289279
ERC1	-0.0159231
XPO1	0.00806257
LINC01587	-0.00615324
RNF13	0.0337743
TRPM3	-1.98457
PALB2	-0.140219
DOP1A	0.068597
LYRM2	-0.0143449
BCKDHB	0.496558
KAT6A	0.0178281
TUT7	0.0158784
ULK2	0.156978
GRHL2	0.18044
TNPO1	-0.0450079
PLOD1	-0.0689509
P2RX5	-0.383973
ITGAE	0.0310477
DIS3	0.0850945
PIBF1	0.251895
TDRD3	0.365448
NUFIP1	-0.372602
PDS5B	0.0503197
OXCT1	1.00601
RRAGB	0.493127
EPYC	0.84301
CYLD	-0.103181
SLC27A5	0.0102334
ZNF324	0.0879393
ZNF671	0.197077
ZNF416	-0.081468
ZNF586	0.33424
ZNF446	0.327859
ZNF264	0.187553
RPS5	-0.151312
FAT1	0.141742
YTHDC1	-0.0531746
CHMP2B	-0.0683627
SMAP2	-0.0719614
PPIE	-0.0930622
ZMPSTE24	-0.196719
STARD7	-0.0189815
NOA1	0.198499
REST	-0.0163836
HAL	0.0712571
SSH1	-0.142065
GSTP1	-0.259961
APLP2	0.0635159
FAM234B	-0.1721
SLCO1A2	0.393174
WBP11	-0.342825
EIF3I	-0.310495
NKAIN1	-0.947591
COL16A1	-0.0469821
TXLNA	-0.232888
NCOA1	0.145566
AGBL5	0.247426
EFR3B	-0.802637
KIF3C	-0.312617
RAB10	-0.0454345
GCKR	-0.752265
HADHA	-0.00852646
MAPRE3	0.0932099
CAD	-0.216933
CD59	0.00642457
CD82	0.129748
BCORL1	0.0134062
ATRX	0.329874
AK6	-0.429227
MYNN	0.185416
MECOM	-0.240852
SCAMP1	0.285019
PREP	0.00393242
HACE1	0.1782
SEH1L	0.0551952
WDR47	-0.220673
WDFY1	0.177239
OVGP1	-0.239944
SLC25A24	0.110756
MAP3K4	0.267685
PILRA	-0.0309843
IGSF9	0.0283941
ABCB1	0.709472
ZNF213	-0.0844838
AKR1B1	-0.654316
CPNE3	0.077179
RRN3	-0.112049
CTTN	0.0230232
WNT11	0.245935
MTIF2	-0.0553406
DDHD2	0.319381
TTC39A	-0.0336307
EPS15	0.33801
ORC1	-0.289275
MGST2	-0.182382
CHERP	-0.278289
ATG16L1	-0.0608589
USP40	0.0519566
POMGNT1	-0.0226925
RAD54L	-0.307593
MAST2	-0.00143349
DNAJA1	-0.698607
B4GALT1	-0.0884309
CHMP5	-0.275912
NFX1	-0.108177
AQP6	0.015845
DIMT1	-0.161451
IPO11	0.0767951
FOLH1	0.84301
EIF2AK1	0.0704323
EPDR1	-0.487375
SNX10	0.175133
SEPHS1	-0.106209
MRPL28	-0.254088
HBQ1	0.278679
ITPKC	-0.211297
CEACAM6	-2.59294
FAT2	-1.85125
RBM22	-0.198642
TMED2	0.0166876
ERO1B	0.064494
ZFAND6	0.182956
HSD17B2	0.0964011
TXLNG	-0.0694153
PPEF1	0.342073
LAT2	-0.287504
HUWE1	-0.0936225
ZW10	-0.00202797
ALG9	0.314539
MYBPC2	-1.69635
ACOX3	0.203513
MTMR2	0.0937758
PPP1R15A	-0.385905
HSD17B14	-0.135809
TRIP6	-0.0924666
ACHE	-1.78548
FTL	-0.213486
SRRT	-0.12233
BAX	0.014612
NLK	0.0249778
PIGS	-0.180839
ADAMTS2	-0.79152
TMPRSS11E	-1.70107
ATXN7L3	0.104791
PGS1	0.153173
PSMC5	-0.279823
UIMC1	0.0675526
CETP	-2.10944
MMP2	-1.85107
LPCAT2	0.354116
GNAO1	0.313183
OGFOD1	-0.298549
SH3BP2	0.444843
NOP14	-0.320107
ADD1	0.0242849
L2HGDH	0.19585
TXNDC16	0.300229
RTRAF	-0.000279387
NID2	-0.985626
GMCL1	0.262433
SF3B2	-0.208383
KLHL42	0.222796
GNAS	0.0373314
DNM1L	-0.0141418
PTHLH	-0.351842
PHACTR3	-0.590198
ERGIC2	0.0713272
TFAP2C	0.186258
AURKA	-0.668076
CASS4	-0.908555
PIR	0.0020841
AAMDC	-0.258204
RFX2	-0.120598
METTL2A	-0.000480301
SULT2B1	-0.260123
ALG6	-0.0258471
CNOT3	-0.0182997
GP6	-0.339786
PTPN4	0.226229
DDX18	-0.0734485
KHSRP	-0.109735
GNA11	0.00630073
ASAP3	-0.093074
EDEM2	-0.0284599
DNMT3B	0.0792249
REM1	-1.01073
TPX2	-0.380259
FER1L4	0.697755
PDRG1	-0.303628
EPB41L1	0.373149
SLC15A1	-1.77361
DOCK9	0.266959
ANKRD10	-0.135703
TGDS	-0.215877
DOCK3	-0.000472671
C3orf18	0.0364027
COQ9	-0.299594
TMEM40	-0.98879
KIF9	-0.224616
ARHGAP28	0.0506515
CRLS1	0.367439
PPP1R13B	-0.0946788
ATRN	0.213695
SMOX	-0.011046
SIGLEC1	-1.23513
FKBP1A	-0.194088
NSFL1C	-0.199257
SLC4A11	-0.0571011
C20orf194	0.514013
ZNF343	0.108261
EBF4	0.0598266
CPXM1	-0.13173
MAVS	0.26817
LZTS3	0.16411
F11	-2.47258
XRN2	0.00570393
KIZ	0.543531
DYNLL1	-0.318908
TESC	0.323719
SNX5	0.0108987
RPL6	-0.0323181
MAPKAPK5	0.153393
P2RX7	-0.756011
ESF1	-0.165344
RBBP9	0.0862066
ANAPC5	0.197836
SLC23A2	0.185232
SLC8B1	-0.115111
TMEM230	0.0588274
DZANK1	0.306101
KDM2B	-0.115024
CFAP61	0.013715
LHX5	-0.878421
TASP1	0.133776
OAS1	-0.813014
GCN1	-0.235368
RPLP0	0.164531
PXN	-0.313906
SIRT4	0.164581
RPH3A	-1.76723
KIF16B	0.080907
TRMT6	-0.0780125
CHGB	-0.500291
PEBP1	0.0339971
TBX5	0.0961175
BRAP	-0.0194207
ERP29	-0.170726
NOS1	-1.17045
FUS	-0.256193
IGBP1	0.385281
FXYD5	-0.257531
ZNF302	0.260946
GRAMD1A	0.105782
FXYD3	-0.0566826
HEPH	-0.930443
CDIP1	-0.179761
CMTM1	-0.133641
KCNH4	-0.924859
GANAB	-0.10971
GMIP	-0.109573
RBM41	0.305183
BIRC5	-0.493361
LAG3	-0.185443
MLF2	-0.207298
OTUB2	-0.330651
DDX24	-0.23557
ZBTB25	0.443163
NECAP1	-0.243268
ARHGAP4	0.0517304
ANKRD24	-0.102666
DHX32	0.272366
RCOR1	-0.0146059
GPATCH2L	0.0634808
LTBP4	0.22512
BLVRB	-0.290035
SLC9A1	-0.520131
SPTLC1	0.0601868
PAPOLA	0.0455722
CCNK	-0.170947
PCBP4	-0.0602272
RGS1	-0.21746
YPEL3	0.340058
MRPS33	-0.140837
NDUFB2	-0.0358642
NUDC	-0.472842
MAEA	-0.13439
ICAM1	-0.86169
STRN4	-0.122755
IRAK3	-0.0286111
SI	1.47863
MUL1	-0.293536
TFAP4	-0.0715091
PDCD7	0.180302
SPG21	0.198682
FETUB	-0.616104
DNAJB11	-0.0674959
P3H2	-0.198212
THPO	-1.14603
CHRD	-1.93604
FLT3LG	-0.563295
RAB11FIP3	0.115592
GNPTG	0.217374
ZNF268	0.135246
GOLGA3	-0.0165143
PABPC4	0.142322
CERS4	0.519597
MCOLN1	-0.422996
USP48	0.109099
EFNB1	-0.279695
PDPR	0.0684705
AARS	-0.231773
GLG1	0.0294624
KIF4A	-0.167127
TNRC6A	0.0107339
PLEKHG2	0.142166
DLL3	-0.0959712
NAT14	0.507776
PITPNM2	0.0174521
EXOC1	0.113795
RBM27	-0.053731
POU4F3	-0.797737
OSBPL8	0.18246
DTX2	-0.206681
NLRC4	-0.367122
PUS7	-0.00640247
LAMB4	-0.232562
NRCAM	-0.354218
LAMB1	0.0873221
SLC26A4	-0.64381
SLC26A3	1.02366
DLD	-0.0978237
WDR7	-0.0236566
TXNL1	-0.125704
IL5RA	-0.926002
ABCC6	1.47669
CMTM6	0.178055
ITGA6	-0.12067
RAPGEF4	1.41486
MAP3K20	-0.0643841
SMPX	0.0961158
FH	-0.0909367
SEL1L3	-0.0373295
TF	0.371044
CDV3	-0.254772
MYO15A	-0.316918
ALKBH5	-0.135472
APOH	-0.6442
NLRP1	-0.4737
PITPNM3	0.406724
SPAG7	-0.165816
ORC6	-0.359732
ZFHX4	-0.427141
SLC17A6	1.20388
ZC3HC1	-0.2236
ESR1	0.034578
RGS17	-0.108133
ANGPT2	0.644569
TMEM101	-0.0482066
CD200	-1.95784
CCDC80	-0.408011
PSME1	-0.296537
PPP2R3C	0.138454
HAUS4	0.249851
JPH4	-0.555107
MYH7	0.0961158
CEBPE	-0.62898
SLC7A8	-0.984271
OSGEP	0.0340713
SLC22A17	0.723222
RNF31	-0.0384428
SCFD1	0.128235
G2E3	0.0303301
HECTD1	0.0917806
HNRNPC	-0.153782
RPGRIP1	0.770828
SUPT16H	-0.129464
TOX4	-0.0670156
GEMIN2	0.0154286
TGM1	0.0532277
TINF2	-0.0172265
SEMA6A	-1.08027
TRPM7	0.177204
TYRO3	0.0427334
WDR76	-0.420429
CAPN3	0.61849
SNAP23	0.0485397
TBX15	0.134635
PHGDH	0.268721
COL9A3	-0.414416
EZR	-0.312176
MYL6	-0.180849
AGO1	0.0238946
TEKT2	-2.29512
CLSPN	-0.316699
RFFL	-0.237871
UNC13D	-0.216401
MFSD11	0.0748024
DPYSL2	0.0830405
TGFB2	-0.174176
GPATCH2	0.245299
NUP50	-0.107192
CDC45	-0.449856
COMT	-0.0516003
ADA2	0.543702
	0.206128
VNN3	-1.20232
ECHDC1	-0.0041134
LRRFIP2	-0.177612
SEC22C	0.0452078
XYLB	0.0786288
HDAC6	0.192757
GABRP	0.0191844
KRT31	-2.62351
CDC6	-0.449404
UPRT	0.0569889
CDC23	0.0340794
AAAS	-0.208451
CBX5	0.13264
SUCO	0.0577861
MSH2	0.104182
MAP3K1	0.152333
DHPS	0.0313783
HOOK2	0.214106
NXPE1	0.157901
ARCN1	-0.165417
EPB41L4B	-0.127025
TMEM38B	-0.0745749
PSMD5	0.0619893
PTGS1	1.13235
NUP188	-0.288829
CRAT	0.122332
SH2D3C	-1.49862
NANS	-0.163537
TBC1D2	-0.123454
WHRN	0.323244
CWF19L1	0.0531814
SEMA4G	0.39417
BTAF1	0.282015
IKZF5	-0.0470008
BLNK	-1.56219
TLL2	-0.953622
CYP26A1	-0.969579
TDRD1	0.0879482
SORBS1	-0.222524
CRTAC1	0.0797355
BAMBI	-1.7528
IL11	-0.0641468
MYO3A	-1.93841
WAC	-0.0548153
CREM	-0.132389
NUBP2	-0.0690666
TPSD1	-0.62522
SMIM24	-1.54523
HIVEP1	-0.210698
FKBP5	-0.265903
SRPK1	-0.0363884
BRPF3	-0.220645
MRPS18A	-0.370233
PGC	-2.11194
TMEM14A	-0.213093
EFHC1	0.636494
NCR2	-0.6442
HSP90AB1	-0.438646
CDC5L	-0.167219
ITPR3	-0.16465
ZNF184	-0.0882638
DSP	0.0594982
SIRT1	0.163452
HNRNPH3	-0.438253
IFT74	0.290208
JAK2	0.18414
IL12RB1	-1.16565
ABL1	-0.110216
ACOT7	-0.605745
SH3GLB1	0.0697635
CDC7	-0.0908388
SYDE2	-0.297772
PCSK5	-0.00663827
SCD	0.994431
TMED1	-0.15843
ABLIM1	0.246965
ERMP1	0.309232
[truncated: 33,112 more rows]
